# Supplementary material for: A Mammalian enhancer trap resource for discovering and manipulating neuronal cell types
Source: eLife. 2016 Mar 21;5:e13503. doi: 10.7554/eLife.13503 (PMC4846381; doi:10.7554/eLife.13503)
Supplement: Figure 2—source data 1. — The numbers of cells (mCitirne+, mCherry+, mCitrine+;mCherry+, and mCitrine-:mCherry+) infection rate (mCitrine+;mCherry+/ mCitirne +) were counted from confocal image stacks from sections near injection sites (5 - 9 sections/line). Infection rates (mCherry+;mCitrine+ /mCitrine) and 'off-target' expression rate (mCherry+;mCitirne-/mCherry+) are shown in average ± SEM. DOI: http://dx.doi.org/10.7554/eLife.13503.012 [file elife-13503-fig2-data1.xlsx]

## Sheet: Sheet1
line - injection site (Panel in Fig2-supFig3)	mCitrine+	mCherry+	mCitrine+:mCherry+	Infection efficiency (mCherry+/mCitrine+) average±SEM	mCitrine-:mCherry+	"off-traget" rate (mCitrine-:mCherry+/mCherry+) Average±SEM
P160-RSP (A)	181	61	61		0
	270	82	82		0
	186	93	92		1
	395	185	185		0
	410	102	102		0
	485	236	236		0
	434	221	221	0.407±0.04	0	0.0015
	2361	980	979	0.414655	1	0.00102041
P136-RSP(B)	102	52	52		0
	72	42	42		0
	58	39	39		0
	68	43	43		0
	81	51	51	0.606±0.028	0	0
	381	227	227	0.595801	0	0
P066-RSP ( C)	85	69	69		0
	72	60	60		0
	57	33	33		0
	61	41	41		0
	58	39	39	0.714±0.048	0	0
	333	242	242	0.726727	0	0
P160-CA1 (D)	284	104	104		0
	322	112	112		0
	215	55	55		0
	342	102	102		0
	212	92	92		0
	245	94	94		0
	346	145	145		0
	315	131	131	0.365±0.177	0	0
	2281	835	835	0.366068	0	0
P057-SSp (E)	52	29	28		1
	27	16	15		1
	42	34	34		0
	52	38	38		0
	41	30	28		2
	38	21	19		2
	54	33	32	0.630±0.043	1	0.044±0.015
	306	201	194	0.633987	7	0.0348259
P039-SUB (F)	52	29	28		1
	58	42	42		0
	38	16	16		0
	42	39	38		1
	51	32	31	0.639±0.083	1	0.019±0.008
	241	158	155	0.643154	3	0.0189873
			average	0.547447		0.00716926
			st dev	0.153252		0.0174129
			sem	0.0625648		0.0071088
