# Supplementary material for: A Mammalian enhancer trap resource for discovering and manipulating neuronal cell types
Source: eLife journal article supplement (doi:10.7554/elife.13503), 2016-03-19

**A**

| localization                                                | density (/square mm) | categories            |
|-------------------------------------------------------------|----------------------|-----------------------|
| Expression in neighboring structures without borders        | > 500                | Widespread            |
|                                                             | 50 – 500             | Sparse                |
|                                                             | 10 – 50              | Scattered             |
| Expressed in neighboring structures but borders are visible | > 50                 | Enriched              |
| Expression in specific structures                           | > 100                | Laminar/Restricted    |
|                                                             | 5 – 100              | Restricted but sparse |

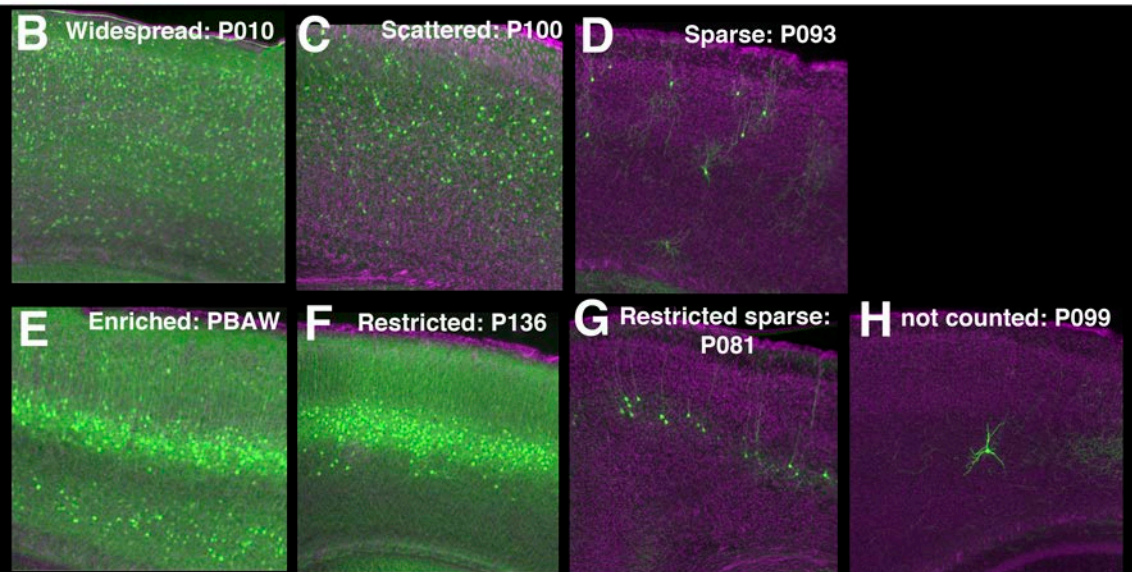

Supplement: supp [file elife-13503-supp-v1.zip]
