# Supplementary material for: A Mammalian enhancer trap resource for discovering and manipulating neuronal cell types
Source: eLife. 2016 Mar 21;5:e13503. doi: 10.7554/eLife.13503 (PMC4846381; doi:10.7554/eLife.13503)
Supplement: Supplementary file 1. — Line names beginning with the letter P are PiggyBac lines, others are lentiviral. Insertion sites and brief description of expression patterns are shown. DOI: http://dx.doi.org/10.7554/eLife.13503.036 [file elife-13503-supp1.xlsx]

## Sheet: Sheet1
Line name	construct	expression	Hopped from	Hopped to	gene information
52L	Lenti(HSP)	piriform cortex, cajal-retzius cell				cryopreserved
53L	Lenti(HSP)	cerebral cortex Layer 5 pyramidal		chr6:31,382,191	Mkln1os intron	cryopreserved
54L	Lenti(HSP)	bone				cryopreserved
56L	Lenti(HSP)	Deep layer6 pyramidal, Brown adipocytes		chr11:97,874,742-97,874,979	Fbxo47 intron	cryopreserved
TCAI	Lenti(HSP)	axons in SC, a few bergman		chr18:74,985,318
TCAO	Lenti(HSP)	strong expression in olfactory cortex. Scattered cortical neurons and glia
TCAR	Lenti(HSP)	a few cells in the cerebral cortex and axon in OB
TCAW	Lenti(HSP)	a few Purkinje
TCBV	Lenti(HSP)	Axon in superior colliculus and dorsal midbrain nucleus
TCCE	Lenti(HSP)	olfactory axon		chr10:65,395,739
TCCK	Lenti(HSP)	dentate gyrus and piriform cortex
TCCM	Lenti(HSP)	caudate putamen
TCCU	Lenti(HSP)	enteric nerve, bergman glia, axons in dorsal brainstem
TCCX	Lenti(HSP)	paws and tails
TCEJ	Lenti(HSP)	columner axons in superior colliculus and olfactory bulb
TCEX	Lenti(HSP)	olfactory bulb
TCFO	Lenti(HSP)	Eppendymal cells
TCGA	Lenti(HSP)	Lateral geniculate nucleus and septum
TCGJ	Lenti(HSP)	cerebellar granule
TCGJ	Lenti(HSP)	DG granule
TCGO	Lenti(HSP)	cerebellar granule				cryopreserved
TCGS	Lenti(HSP)	primary sensory layer4		chr11:69,690,646	Tnfsfm13 intron	cryopreserved
TCHP	Lenti(HSP)	columner expression in cerebral cortex
TCHV	Lenti(HSP)	Cerebellar basket,&purkinje
TCIB	Lenti(HSP)	cerebellar granule				cryopreserved
TCIF	Lenti(HSP)	few cortical inhibitory neurons		chr6:22,346,348	Fam3C intron
TCJD	Lenti(HSP)	Lateral geniculate nucleus
TCJD	Lenti(HSP)	dorsal Lateral geniculate nucleus and subset of cerebellar granule
TCJZ	Lenti(HSP)	asymetric expression. only in left cortex
TCKC	Lenti(HSP)	a few neuron in hippocampus
TCKK	Lenti(HSP)	only in oflactroy bulb
TCKZ	Lenti(HSP)
TCLC	Lenti(HSP)	scattered expression in cortex, subset of cerebelllar granule
TCLE	Lenti(HSP)	subset of granule cells
TCLU	Lenti(HSP)	scattered glia
TCLW	Lenti(HSP)	unipolar brush cell like cells in cerebellum
TCMA	Lenti(HSP)	anterior caudate putamen
TCIA	Lenti(minCamKII)	olfactory bulb
TCIJ	Lenti(minCamKII)	olfactory bulb
TCIK	Lenti(minCamKII)	olfactory bulb
TCIO	Lenti(minCamKII)	a few neurons in hippocampus
TCJJ	Lenti(minCamKII)	Subiculum-CA1 pyramidal
TCKD	Lenti(minCamKII)	cortex Layer 4				cryopreserved
TCFQ	Lenti(CamKII)	Layer4, striatum
TCFP	Lenti(CamKII)	cortical inhibitory/pyramidal mix		chr12:95,171,577
TCFT	Lenti(CamKII)	pyramidal sending axon to thalamus
TCFU	Lenti(CamKII)	a few layer 6
TCBQ	Lenti(119)	amygdala
46L	Lenti(122)	limbic cortex, hippocampal and subicular neurons; some glia, bergman				cryopreserved
48L	Lenti(122)	piriform cortex		chr9:89,717,364		cryopreserved
TCBK	Lenti(170)	mixture of cortical excitatory and inhibitory, striatum		chr10:10,262,372
P001	PB(tet)	few cell in hindbrain	chrX:12,152,006(PBAW)	chr14:35,570,356	Grid1 intron
P005	PB(tet)	Entorhinal cortex, amygdala, broad in blood vessels	ND(PBAG)	chr14:12,126,458	Ptprg intron	terminated
P006	PB(tet)	limbic, cingulate, retrospleniel cortex, retinal axons in SC, lateral- ventral hippocampus, major island of Calleja	chrX:12,152,006(PBAW)	chr3:51,961,289	104kb downstream to Maml3, 142kb upstream to Maml3	active
P008	PB(tet)	subiculum, striatum, fasciola cinereum	chrX:12,152,006(PBAW)	chr16:35,068,990	Ptp1b intron	cryopreserved
P009	PB(tet)	strong labeling in posterior retrospleniel cortex, very sparse cortex,	chrX:12,152,006(PBAW)	chr13:34,610,961	266kb downstream to Slc22a23, 16kb upstream to 1300014I06Rik	terminated
P010	PB(tet)	broad	ND(PBAG)	chr2:20,964,494	Arhgap21 intron	terminated
P012	PB(tet)	ventro-orbital cortex, limbic cortex, cingulate, retrosplenial disgranular, V1 layer5, Auditory layer5, claustrum,cerebellar granule, ventral hippocampus, cortical amygdalar area	ND(PBAG)	chr17:31,156,803	12kb downstream to Tff2, 4.6kb upstream to Tff1	cryopreserved
P013	PB(tet)	Layer 4 and layer 6,	chrX:12,152,006(PBAW)	chrX:12,298,897	138kb downstream to Bcor, 40kb upstream to Gm14635	terminated
P014	PB(tet)	OB, DG, CA1 subpopulation, Purkinje, medial orbital cortex, postpiriform transition area	chrX:12,152,006(PBAW)	chr9:18,560,143	75kb downstream to Mbd3l1, 194kb upstream to Olfr24	cryopreserved
P015	PB(tet)	Sparse in cortex, piriform, thalamus. axons in DG	chrX:12,152,006(PBAW)	chr17:55,848,851	Emr4 intron	terminated
P018	PB(tet)	densely CA1,cingulate cortex, claustrum,entorhinal deep layer	chrX:12,152,006(PBAW)	ND: Repeating Elements		cryopreserved
P022	PB(tet)	frontal, cingulate, V1 and S1 layer 6 projecting mainly primary thalamic nuclei, insular cortex, amygdala, septum	chrX:12,152,006(PBAW)	chr3:45,368,517	2610316D01Rik intron	terminated
P023	PB(tet)	only in salivary gland, no expression in brain	chrX:12,152,006(PBAW)	chr17:85,992,860	Srbd intron	terminated
P024	PB(tet)	Sparse hippocampus, CA1, CA3, DG. Induseum griseum	chrX:12,152,006(PBAW)	chr7:25,870,261	53kb downstream to Cyp2s1, 27kb upstream to Cyp2b10	cryopreserved
P025	PB(tet)	frontal, limbic cortex, claustrum, CA1, subiculum, interpeduncular nucleus	chrX:12,152,006(PBAW)	chr2:157,163,404	Rbl1 intron	cryopreserved
P026	PB(tet/cre)	broad	chr11:57,984,941(PBAS)	chr14:28,675,693	152kb downstream to Wnt5a, 229kb upstream to Cacna2d3	terminated
P027	PB(tet)	sparse CA1, occipital cortex. layer6 pyramidal projecting thalamus	chrX:12,152,006(PBAW)	chr9:27,125,870	Jam3 intron	terminated
P029	PB(tet)	broadly expressed in forebrain	chrX:12,152,006(PBAW)	chr13:106,783,740	1Mb downstream to Htr1a, 10kb upstream to Ipo11	terminated
P031	PB(tet)	broadly in cortex but not layer3-4	ND(PBAG)	chr5:126,193,505	405kb downstream to Tmem132b, 837kb upstream to 4933438B17Rik	terminated
P032	PB(tet/cre)	entorhinal L2/3, sparse L2/3, 5, 6, dorsal medulla/spinal cord	chr1:19,763,717(PBAU)	chr9:32,360,273	16kb downstream to Kcnj5, 12kb upstream to Kcnj1	cryopreserved
P033	PB(tet)	mainly cortical layer5, cerebellar granule projecting ML inner half	chrX:12,152,006(PBAW)	chr3:8,683,273	16kb downstream to Hey1, 118kb upstream to Mrps28	terminated
P034	PB(tet)	Layer5 and 6, Purkinje	ND(PBAG)	chr5:18,344,260	Gnai1 intron	cryopreserved
P035	PB(tet)	L6 projecting thalamus	chrX:12,152,006(PBAW)	chrX:12,391,483	36kb downstream to Gm14635, 196kb upstream to Atp6ap2	cryopreserved
P036	PB(tet)	layer 2/3, 5 thin tufted? striatum, hippocampus++	chrX:12,152,006(PBAW)	chr14:98,714,032	544kb downstream to Dach1, 320kb upstream to Mzt1	cryopreserved
P037	PB(tet)	sparse cortex & hippocampus. labeling in lateral hippocampus	chrX:12,152,006(PBAW)	chr13:22,027,792	18kb downstream to Prss16, 7.4kb upstream to Hist1h2ah	terminated
P038	PB(tet/cre)	Entorhinal cortex deep layer	chr1:19,763,717(PBAU)	chr14:34,013,652	34kb downstream to Zfp488, 27kb upstream to Gm5460	active
P039	PB(tet/cre)	subiculum, layer5 pyramidal, hypothalamus near preoptic area, thalamic nuclei including dorsal lateral geniculate	chr1:19,763,717(PBAU)	chr17:59,729,655	716kb downstream to Nudt12, 1Mb upstream to Mir466g	cryopreserved
P040	PB(tet/cre)	broad	chr1:19,763,717(PBAU)	chr4:22,494,655	AK139518 intron	terminated
P041	PB(tet/cre)	sparse cortex, thalamus, ventral CA1, axons in DG,infralimbic	chr11:57,984,941(PBAS)	chr11:57,957,595	125kb downstream to Hand1, 51kb upstream to Larp1	active
P044	PB(tet)	cortex layer5 and 6	chrX:12,152,006(PBAW)	chr8:37,091,715	97kb downstream to AI429214, 430kb upstream to Sgcz	terminated
P046	PB(tet/cre)	sparse labeling in cortex and CA1. AON, few cells in subiculum	chr11:57,984,941(PBAS)	chr10:59,242,508	18kb downstream to Sowahc, 80kb upstream to P4ha1	terminated
P047	PB(tet)	Piriform,DG, ventral entorhinal, AON, consistent labeling in few cells in subiculum	chrX:12,152,006(PBAW)	chr16:16,552,993	Fgd4 intron	lost
P048	PB(tet)	Piriform,AON, DG, subiculum, CA2?	chrX:12,152,006(PBAW)	chrX:36,404,582	Gm6268 intron	cryopreserved
P050	PB(tet)	L5/6 pyramidal broad, hippocampus	chrX:12,152,006(PBAW)	chrX:144,158,547	A730046J19Rik intron	terminated
P054	PB(tet)	very few cell in subiculum	chrX:12,152,006(PBAW)	chr17:25,386,712	Cacna1h intron	terminated
P055	PB(tet)	basolateral amygdala, cortico-amygdaloid and lateral entorhinal cortex	ND(PBAG)	chr5:74,472,359	Scfd2 intron	cryopreserved
P056	PB(tet/cre)	layer5/6(broad) &2/3, some neurons in cerebellum	chr11:57,984,941(PBAS)	chr11:41,583,711	828kb downstream to Ccng1, 326kb upstream to Gabrg2	terminated
P057	PB(tet/cre)	V1 & S1 thick tufted layer5 pyramidal (also L2/3 pyramidal in V1), lateral striaturm (direct pathway), purkinje, superior and inferior colliculus, AON	chr1:19,763,717(PBAU)	chr1:20,654,539	36kb downstream to Pkhd1, 24kb upstream to Mir206	cryopreserved
P059	PB(tet)	cortical interneuron? CA1, CA3, piriform	ND(PBAG)	ND: repeating elements		terminated
P061	PB(tet)	broadly cortex	ND(PBAG)	chr12:91,550,038	11kb downstream to Tshr, 5.2kb upstream to Gtf2a1	terminated
P062	PB(tet)	subiculum-CA1, CA2-3, limbic cortex,basolateral amygdala,hypothalamus near ventricle	ND(PBAG)	chr1:40,732,533	Slc9a2 intron	cryopreserved
P063	PB(tet)	Thalamic nuclei, cellebelar basket, auditory cortex layer4	chr7(repeating elements)(PBAQ)	chr8:88,506,469	144kb downstream to Brd7, 14kb upstream to Nkd1	cryopreserved
P064	PB(tet/cre)	dorsal CA1, sparsely Purkinje, taenia tecta, cortical layer 6	chr1:19,763,717(PBAU)	chr11:30,056,693	30kb downstream to Eml6, 42kb upstream to Spnb2	cryopreserved
P066	PB(tet/cre)	entorhinal cortex upper layer, cortical interneuron, subiculum, retrosplenial cortex, inferior olive	chr1:19,763,717(PBAU)	chr4:74,665,314	260kb downstream to Kdm4c, 612kb upstream to 3110001D03Rik	cryopreserved
P067	PB(tet)	glia and cortical neurons	chrX:12,152,006(PBAW)	chrX:98,891,151	166b downstream to Ophn1, 46kb upstream to Yipf6	terminated
P068	PB(tet)	Unstable expression. CA1-CA3, scattered cells in cortex. cerebellar granule projecting basal half of molecular layer.	chrX:12,152,006(PBAW)	chr3:86,962,990	42kb downstream to Dclk2, 23kb upstream to Cd1d2	terminated
P070	PB(tet)	layer5/6 broad	chrX:12,152,006(PBAW)	chrX:11,916,520	588kb downstream to Gm4906, 120kb upstream to Bcor	terminated
P071	PB(tet/cre)	scattered in cortex, entorhinal deep layer, CA1 ,piriform	chr11:57,984,941(PBAS)	chr4:53,198,968	39kb downstream to Abca1, 47kb upstream to 4930522O17Rik	terminated
P072	PB(tet)	sparse DG	chrX:12,152,006(PBAW)	chr4:99,362,179	103kb downstream to Atg4c, 294kb upstream to Foxd3	terminated
P073	PB(tet)	V1&restrosplenial layer6, limbic, amygdala,	chrX:12,152,006(PBAW)	chr7:6,413,471	18kb downstream to Zfp28, 1.7kb upstream to Gm16532	cryopreserved
P074	PB(tet/cre)	somatosensory and motor layer5 projecting caudate putamen, subiculum, AON	chr11:57,984,941(PBAS)	chrX:63,839,235	AK198757 intron	active
P076	PB(tet)	very sparse	chrX:12,152,006(PBAW)	ND:repeating elements		terminated
P078	PB(tet)	S1,V1 subcerebral projeciting layer5	chrX:12,152,006(PBAW)	chr18:59,005,286	Adamts19 intron	active
P079	PB(tet)	caudate putamen, inferior colliculus,endopiriform nucleus	chrX:12,152,006(PBAW)	chr12:3,842,061	Dnmt3a intron	cryopreserved
P080	PB(tet)	broad	chrX:12,152,006(PBAW)	chr14:75,271,659	Cpb2 intron	terminated
P081	PB(tet/cre)	M1,S1 layer5 thick tufted and layer2/3	chr11:57,984,941(PBAS)	chr19:13,376,368	OR5B2 intron	active
P084	PB(tet)	Somatosensory layer5 projecting thalamus,layer6 in temporal cortex, subiculum, Anterior medial thalamic nucleus.	chrX:12,152,006(PBAW)	chr18:21,064,740	Mep1b intron	active
P092	PB(tet)	Layer6, piriform	chrX:12,152,006(PBAW)	chrX:12,292,960	132kb downstream to Bcor, 46kb upstream to Gm14635	cryopreserved
P093	PB(tet)	interneuron in cortex, midbrain	chrX:12,152,006(PBAW)	ND:chr5 or 7		cryopreserved
P096	PB(tet)	scattered neuron in cortex, CA1 pyramidal,purkinje	chrX:12,152,006(PBAW)	chrX:12,640,512	24kb downstream to Atp6ap2, 11kb upstream to Gm4984	terminated
P097	PB(tet)	broad	chrX:12,152,006(PBAW)	chr14:83,756,265	3Mb downstream to Olfm4, 687kb upstream to Pcdh17	terminated
P099	PB(tet)	retrosplenial cortex, granule layer of AOB	chrX:12,152,006(PBAW)	chr3:98,790,185	27kb downstream to Hsd3b3, 15kb upstream to Hsd3b6	active
P100	PB(tet/cre)	broadly cortex	chr1:19,763,717(PBAU)	chr1:90,171,874	18kb downstream to Iqca, 32kb upstream to Cxcr7	terminated
P101	PB(tet)	from the same mother with P078 and has the same insertion site and expression	chrX:12,152,006(PBAW)	chr18:59,005,286	Adamts19 intron	terminated
P102	PB(tet)	cerebellar basket, AON, piriform, lateral hippocampus	ND(PBAG)	chr18:20,954,937	Rnf125 intron	cryopreserved
P103	PB(tet/cre)	hippocampus, amygdala, scattered neuron in cortex	chr11:57,984,941(PBAS)	chr11:57,280,444	Gria1 intron	cryopreserved
P105	PB(tet)	strong in V1 layer4,entorhinal L2, scattered in cortex, dorsal spinal cord	chrX:12,152,006(PBAW)	chr10:108,317,264	39kb downstream to Ppp1r12a, 14kb upstream to Pawr	terminated
P106	PB(tet/cre)	layer5/6 broad	chr1:19,763,717(PBAU)	chr12:119,395,766	157kb downstream to Itgb8, 47kb upstream to Macc1	terminated
P107	PB(tet/cre)	Frontal secondary motor cortex, Entorhinal cortex layer 2/3, subiculum,retrosplenial cortex, gustatory/agranular cortex layer5	chr1:19,763,717(PBAU)	chr1:72,221,604	9.5kb downstream to Mreg, 37kb upstream to Pecr	cryopreserved
P108	PB(tet/cre)	Dorsal hindbrain, sparse cerebellar basket,cortical interneuron, olfactory granule layer	chr11:57,984,941(PBAS)	chr15:99,913,068	37kb downstream to Lima1, 5.3kb upstream to 1700030F18Rik	cryopreserved
P109	PB(tet/cre)	Purkinje sparsely labeled	chr11:57,984,941(PBAS)	chr11:70,856,289	Rabep1 intron	terminated
P110	PB(tet/cre)	cortical interneuron, neuron in granule layer of oflactory bulb, AON, tania tecta, midbrain, scattered cerebellar busket and Purkinje	chr11:57,984,941(PBAS)	chr7:37,905,806	136kb downstream to Zfp536, 54kb upstream to C80913	cryopreserved
P111	PB(tet/cre)	Different individual expression. Dorsal CA1, entorhinal cortex deep layer.	chr11:57,984,941(PBAS)	ND: Repeating Elements		cryopreserved
P112	PB(tet/cre)	subiculum, subset of purkinje	chr11:57,984,941(PBAS)	chr11:57,991,468	159kb downstream to Hand1, 17kb upstream to Larp1	lost
P113	PB(tet)	Piriform, Entorhinal cortex, basolateral amygdala, subiculum	chrX:12,152,006(PBAW)	chr17:83,107,283	29kb downstream to Gm19689, 108kb upstream to Pkdcc	cryopreserved
P115	PB(tet/cre)	PBAS local hop: similar expression with P112 and P143	chr11:57,984,941(PBAS)	chr11:57,985,232	153kb downstream to Hand1, 23kb upstream to Larp1	terminated
P118	PB(tet/cre)	inferior colliculus, subbiculum, hypothalamus, lateral Interpeduncular nucleus	chr1:19,763,717(PBAU)	chr7:123,122,639	120kb downstream to Rbbp6, 1.2kb upstream to Tnrc6a	cryopreserved
P119	PB(tet/cre)	layer5	chr1:19,763,717(PBAU)	chr1:71,003,952	121kb downstream to Vwc2l, 23kb upstream to Bard1	lost
P122	PB(tet/cre)	cortico-amygdaloid, ventral retrosplenial cortex	chr11:57,984,941(PBAS)	chrX:117,780,517	765kb downstream to Gm14920, 646kb upstream to Tgif2lx2	cryopreserved
P124	PB(tet/cre)	cortico-thalamic layer5 pyramidal	chr11:57,984,941(PBAS)	chr13:93,494,220	Jmy intron	cryopreserved
P125	PB(tet)	retrosplenial cortex	chrX:12,152,006(PBAW)	chr6:92,086,441	11kb downstream to Fgd5, 5.0kb upstream to Nr2c2	terminated
P126	PB(tet/cre)	ventral hippocampus, scattered purkinje, hypothalamic nucleus around preoptic area, upper layer of perihinal cortex	chr11:57,984,941(PBAS)	chr11:57,971,040	139kb downstream to Hand1, 38kb upstream to Larp1	active
P128	PB(tet)	broad	chrX:12,152,006(PBAW)	chrX:12,850,897	29kb downstream to Gm14634, 191kb upstream to 5730405O15Rik	terminated
P129	PB(tet)	Septum, ventral striatum, hypothalamus, cerebellum	chrX:12,152,006(PBAW)	chr18:13,689,352	Zfp521 intron	lost
P130	PB(tet)	olfactory bulb, sparsely exppressed in DG, purkinjke	chrX:12,152,006(PBAW)	chr11:119,281,548	287b downstream to Gaa, 1.6kb upstream to Gaa	terminated
P133	PB(tet/cre)	medial entorhinal cortex layer2, scattered neuron in cortex, midbrain	chr1:19,763,717(PBAU)	chr1:20,386,356	Pkhd1 intron	cryopreserved
P134	PB(tet/cre)	cortical interneurons, Lugaro like cells in cerebellum, superior olive complex, presumably pedunculopontine nucleus	chr1:19,763,717(PBAU)	chr6:12,205,552	95kb downstream to Gm6578, 106kb upstream to Thsd7a	cryopreserved
P135	PB(tet/cre)	Subcerebral/corticothalamic Layer5 pyramidal	chr1:19,763,717(PBAU)	ND: repeating elements		cryopreserved
P136	PB(tet/cre)	Layer5 cortico-striatal neurons, medial geniculate and submedial nuclus of thalamus	chr11:57,984,941(PBAS)	chr11:59,316,313	Wnt9a intron	active
P138	PB(tet/cre)	hippocampus,endopiriform nucleus, M1 and S1 layer6b, ventral lateral geniculate nucleus	chr11:57,984,941(PBAS)	chr14:27,210,770	Arhgef3 intron	cryopreserved
P139	PB(tet)	Cortico-thalamic Layer6 in lateral cortex (mainly S2), basolateral amygdala	chrX:12,152,006(PBAW)	chr7:30,036,710	Zfp14 intron	active
P141	PB(tet/cre)	subiculum	chr11:57,984,941(PBAS)	chr9:94,579,728	41kb downstream to 1190002N15Rik, 90kb upstream to Slc9a9	cryopreserved
P143	PB(tet/cre)	PBAS local hop: similar expression with P115 and P112	chr11:57,984,941(PBAS)	chr11:57,979,511	147kb downstream to Hand1, 29kb upstream to Larp1	terminated
P144	PB(tet/cre)	sparsly in Dentate gyrus, limbic cortex	chr1:19,763,717(PBAU)	ND: repeating elements		terminated
P146	PB(tet)	broadly in cortex	chrX:12,152,006(PBAW)	chr6:31,170,405	BC145649 intron	terminated
P147	PB(tet)	Dentate gyrus, limbic cortex	chrX:12,152,006(PBAW)	ND: repeating elements		cryopreserved
P149	PB(tet/cre)	M1. S1 layer5/6 subcereberal projecting neurons, CA1,entorhinal cortex	chr1:19,763,717(PBAU)	ND:repeating elements		terminated
P152	PB(tet/cre)	Subcereberal/corticothalamic Layer5 pyramidal, solitary nucleus	chr11:57,984,941(PBAS)	chr5:43,231,543	Gm7854 intron	terminated
P153	PB(tet)	broad	chrX:12,152,006(PBAW)	chrX:13,277,444	29kb downstream to 2010308F09Rik, 3.6kb upstream to Ddx3x	terminated
P154	PB(tet)	Dentate gyrus, striatum	chrX:12,152,006(PBAW)	chr10:20,486,427	Pde7b intron	terminated
P157	PB(tet)	orbital cortex and agranular insular layer2/3, S1/M1 layer5 (weaker in barel field), caudal subiculum, dentate gyrus(mainly dorsal half)	chrX:12,152,006(PBAW)	chr11:31,439,676	69kb downstream to Stc2, 225kb upstream to Bod1	cryopreserved
P159	PB(tet)	cerebellar Lugaro cells, scattered glia, medial CA1	chrX:12,152,006(PBAW)	chr2:165,465,849	Slc13a3 intron	cryopreserved
P160	PB(tet/cre)	dorsal CA1,subiculum, V1 layer4, retrosplecnial cortex	chr11:57,984,941(PBAS)	chr9:105,581,618	60kb downstream to Atp2c1, 61kb upstream to Pik3r4	cryopreserved
P161	PB(tet/cre)	callosal Layer5. Layer4 in auditory, visceral, gustatory cortices.Septum, hypothalamus, midbrain,solitary nucleus	chr11:57,984,941(PBAS)	chr1:176,338,397	63kb downstream to Pld5, 395kb upstream to Cep170	cryopreserved
P162	PB(tet/cre)	cortico-thalamic Layer6 in S1 and V1 projecting primary sensory thalamic nucleus (VPM and LGd) , ventral hippocampus,medial piriform	chr11:57,984,941(PBAS)	ND:		active
P163	PB(tet/cre)	Layer5/6	chr11:57,984,941(PBAS)	chr4:96,733,622	Gm12695 intron	terminated
P165	PB(tet/cre)	Scattered throughout cortex. Strong in Layer 5.	chr11:57,984,941(PBAS)	chr14:28,787,639	264kb downstream to Wnt5a, 117kb upstream to Cacna2d3	terminated
P169	PB(tet/cre)	Astrocytes	chr11:57,984,941(PBAS)	chr11:61,620,848	41kb downstream to Epn2, 32kb upstream to Grap	terminated
P170	PB(tet/cre)	Lateral hippocampus, basolateral amygdala, sexually dimorphic expression in medial preoptic area and bed nucleus stria terminals	chr11:57,984,941(PBAS)	chr11:58,074,390	15kb downstream to Larp1, 29kb upstream to Cnot8	active
P172	PB(tet)	Layer 4 neurons in primary sensory cortices and scattered neurons in cortex. Dorsal caudate putamen	chrX:12,152,006(PBAW)	chr10:42,032,233	13kb downstream to Armc2, 153kb upstream to Foxo3	active
P173	PB(tet)	Broadly Layer 6	chrX:12,152,006(PBAW)	chrX:12,528,999	174kb downstream to Gm14635, 58kb upstream to Atp6ap2	cryopreserved
P187	PB(tet)	Tenia tecta, dentate gyrus	chrX:12,152,006(PBAW)	chr10:60,208,425	Chst3 intron	active
P197	PB(tet)	part of subiculum and ventral retrosplenial cortex	chrX:12,152,006(PBAW)	chrX:162,499,888		active
