# Supplementary material for: A Mammalian enhancer trap resource for discovering and manipulating neuronal cell types
Source: eLife. 2016 Mar 21;5:e13503. doi: 10.7554/eLife.13503 (PMC4846381; doi:10.7554/eLife.13503)
Supplement: Supplementary file 2. — DOI: http://dx.doi.org/10.7554/eLife.13503.037 [file elife-13503-supp2.xlsx]

## Sheet: Sheet1
		P005	P006	P008	P009	P010	P012	P013	P014	P015	P018	P022	P024	P025	P026	P027	P029	P031	P032	P033	P034	P035	P036	P037	P038	P039	P040	P041	P044	P046	P047	P048	P050	P054	P055	P056	P057	P059	P061	P062	P063	P064	P066	P067	P068	P070	P071	P072	P073
Isocortex	FRP	scattered				widespread		restricted/laminar			restricted/laminar	scattered			scattered	sparse	enriched	enriched	sparse	restricted/laminar	enriched		scattered					sparse	enriched	sparse			enriched	sparse		enriched		widespread	widespread				sparse	scattered	scattered	enriched	sparse
	MOp	scattered	restricted but sparse			widespread	sparse	restricted/laminar			scattered	scattered			scattered	sparse	enriched	enriched	sparse	restricted/laminar	enriched	restricted/laminar	scattered			restricted but sparse		sparse	enriched	sparse			enriched	sparse		enriched		widespread	widespread			restricted but sparse	sparse	scattered	scattered	enriched	sparse		sparse
	SSp-bfd	scattered				widespread		restricted/laminar		sparse	restricted/laminar	scattered			scattered	sparse	enriched	enriched	sparse	restricted/laminar	enriched	restricted/laminar	scattered			restricted but sparse		sparse	enriched	sparse			enriched	sparse		enriched	restricted/laminar	widespread	widespread			restricted but sparse	sparse	scattered	scattered	enriched	sparse
	GU	scattered				widespread		restricted/laminar			restricted/laminar	scattered			scattered	sparse	enriched	enriched	sparse	restricted/laminar	enriched	restricted/laminar	scattered			restricted but sparse		sparse	enriched	sparse			enriched	sparse		enriched		widespread	widespread			restricted but sparse	sparse	scattered	scattered	enriched	sparse
	VISC	scattered				widespread		restricted/laminar			restricted/laminar	scattered			scattered	sparse	enriched	enriched	sparse	restricted/laminar	enriched	restricted/laminar	scattered			restricted but sparse		sparse	enriched	sparse			enriched	sparse		enriched		widespread	widespread			restricted but sparse	sparse	scattered	scattered	enriched	sparse
	VISp	scattered				widespread	restricted but sparse	restricted/laminar			restricted/laminar	scattered			scattered	sparse	enriched	enriched	sparse	restricted/laminar	enriched	restricted/laminar	scattered			restricted but sparse		sparse	enriched	sparse			enriched	sparse		enriched	enriched	widespread	widespread			restricted but sparse	sparse	scattered	scattered	enriched	sparse
	ACAd	scattered				widespread	restricted/laminar	restricted/laminar			restricted but sparse	scattered			scattered	sparse	enriched	enriched	sparse	restricted/laminar	enriched	restricted/laminar	scattered			restricted but sparse		sparse	enriched	sparse			enriched	sparse		enriched		widespread	widespread			restricted but sparse	sparse	scattered	scattered	enriched	sparse		sparse
	PL	scattered				widespread		restricted/laminar			restricted/laminar	scattered			scattered	sparse	enriched	enriched	sparse	restricted/laminar	enriched	restricted/laminar	scattered			restricted but sparse		sparse	enriched	sparse			enriched	sparse		enriched		widespread	widespread			restricted but sparse	sparse	scattered	scattered	enriched	sparse
	ILA	scattered	restricted/laminar			widespread	scattered	restricted/laminar	restricted but sparse		restricted/laminar	scattered	enriched	sparse	scattered	sparse	enriched	enriched	sparse	restricted/laminar	enriched	restricted/laminar	scattered			restricted but sparse		sparse	enriched	sparse			enriched	sparse		enriched		widespread	widespread	enriched		restricted but sparse	sparse	scattered	scattered	enriched	sparse		sparse
	ORBm	scattered				widespread	enriched	restricted/laminar			restricted/laminar	scattered			scattered	sparse	enriched	enriched	sparse	restricted/laminar	enriched	restricted/laminar	scattered			sparse		sparse	enriched	sparse			enriched	sparse		enriched		widespread	widespread			restricted but sparse	sparse	scattered	scattered	enriched	sparse		sparse
	AId	scattered				widespread	restricted but sparse	restricted/laminar			restricted/laminar	scattered			scattered	sparse	enriched	enriched	sparse	restricted/laminar	enriched	restricted/laminar	scattered			restricted but sparse		sparse	enriched	sparse			enriched	sparse		enriched		widespread	widespread			restricted but sparse	sparse	scattered	scattered	enriched	sparse		sparse
	AIp	scattered				widespread	restricted but sparse	restricted/laminar			restricted/laminar	scattered			scattered	sparse	enriched	enriched	sparse	restricted/laminar	enriched	restricted/laminar	scattered			restricted but sparse		sparse	enriched	sparse			enriched	sparse		enriched		widespread	widespread			restricted but sparse	sparse	scattered	scattered	enriched	sparse		sparse
	AIv	scattered				widespread	restricted but sparse	restricted/laminar			restricted/laminar	scattered			scattered	sparse	enriched	enriched	sparse	restricted/laminar	enriched	restricted/laminar	scattered			restricted but sparse		sparse	enriched	sparse			enriched	sparse		enriched		widespread	widespread			restricted but sparse	sparse	scattered	scattered	enriched	sparse		sparse
	RSPd	scattered				widespread	restricted but sparse	restricted/laminar			restricted/laminar	scattered			scattered	sparse	enriched	enriched	sparse	restricted/laminar	enriched	restricted/laminar	scattered			sparse		sparse	enriched	sparse			enriched	sparse		enriched		widespread	widespread				sparse	scattered	scattered	enriched	enriched		restricted/laminar
	RSPv	scattered	restricted/laminar		restricted/laminar	widespread	restricted but sparse	restricted/laminar			restricted/laminar	scattered			scattered	sparse	enriched	enriched	sparse	restricted/laminar	enriched	restricted/laminar	scattered			sparse		sparse	enriched	sparse			enriched	sparse		enriched		widespread	widespread				sparse	scattered	scattered	enriched	sparse		restricted/laminar
	PTLp	scattered				widespread	restricted but sparse	restricted/laminar			restricted/laminar	scattered			scattered	sparse	enriched	enriched	sparse	restricted/laminar	enriched	restricted/laminar	scattered			sparse		sparse	enriched	sparse			enriched	sparse		enriched		widespread	widespread			restricted but sparse	sparse	scattered	scattered	enriched	sparse
	ECT	scattered				widespread		restricted/laminar			restricted/laminar	scattered			scattered	sparse	enriched	enriched	sparse	restricted/laminar	enriched	restricted/laminar	scattered			restricted but sparse		sparse	enriched	sparse			enriched	sparse		enriched		widespread	widespread			restricted but sparse	sparse	scattered	scattered	enriched	sparse
Olfactory Areas	MOB	scattered	restricted/laminar		scattered	widespread	scattered	restricted/laminar			restricted/laminar				enriched	sparse	sparse	enriched	sparse	restricted/laminar	enriched		scattered					sparse	enriched	sparse	scattered		enriched	sparse				scattered		restricted but sparse	sparse	scattered		scattered	scattered
	AOB	scattered				widespread		restricted/laminar			restricted/laminar					sparse		enriched	sparse	restricted/laminar	enriched	scattered	scattered					sparse	enriched	sparse			enriched	sparse				scattered						scattered	scattered
	AON	scattered			scattered	widespread		restricted/laminar			restricted/laminar					sparse	sparse	enriched	sparse	restricted/laminar	enriched		scattered					sparse	enriched	sparse	enriched	enriched	enriched	sparse			scattered	widespread			scattered		sparse	scattered	scattered	widespread
	TT	scattered				widespread		restricted/laminar			restricted/laminar					sparse		enriched	sparse	restricted/laminar	enriched		scattered					sparse	enriched	sparse			enriched	sparse								restricted but sparse		scattered	scattered
	PIR	scattered	sparse			widespread		restricted/laminar		restricted but sparse	restricted/laminar	restricted/laminar		sparse		sparse	scattered	enriched	sparse	restricted/laminar	enriched	restricted/laminar	scattered					sparse	enriched	sparse	restricted/laminar	restricted/laminar	enriched	sparse			sparse	enriched	enriched		sparse			scattered	scattered	enriched	restricted/laminar		restricted but sparse
	NLOT	scattered				widespread		restricted/laminar			restricted/laminar	enriched				sparse		enriched	sparse	restricted/laminar	enriched		scattered					sparse	enriched	sparse			enriched	sparse										scattered	scattered
	COAa	scattered	sparse			widespread		restricted/laminar			restricted/laminar			enriched		sparse		enriched	sparse	restricted/laminar	enriched		enriched			sparse		sparse	enriched	sparse	restricted/laminar		scattered	sparse	restricted/laminar		sparse	enriched	enriched		restricted but sparse			scattered	scattered
	COAp	scattered	sparse			widespread	enriched	restricted/laminar			restricted/laminar			enriched		sparse		enriched	sparse	restricted/laminar	enriched		enriched			sparse		sparse	enriched	sparse	restricted/laminar		scattered	sparse	restricted/laminar		sparse	enriched	enriched		restricted but sparse			scattered	scattered				sparse
	PAA	scattered				widespread		restricted/laminar			restricted/laminar					sparse		enriched	sparse	restricted/laminar	enriched		scattered					sparse	enriched	sparse			enriched	sparse			scattered							scattered	scattered
	TR	scattered				widespread		restricted/laminar	enriched		restricted/laminar					sparse		enriched	sparse	restricted/laminar	enriched		scattered					sparse	enriched	sparse			enriched	sparse										scattered	scattered
Hippocampus	CA1	scattered	scattered			widespread		restricted/laminar	sparse		restricted/laminar		scattered	restricted/laminar	scattered	sparse	restricted/laminar	enriched	sparse	restricted/laminar	enriched	restricted but sparse	scattered	sparse				sparse	enriched	sparse			enriched	sparse		restricted/laminar	sparse	enriched	restricted but sparse	restricted but sparse		restricted/laminar	sparse	scattered	scattered		restricted/laminar		scattered
	CA2	scattered	scattered			widespread		restricted/laminar			restricted/laminar				scattered	sparse		enriched	sparse	restricted/laminar	enriched		scattered	sparse				sparse	enriched	sparse		enriched	enriched	sparse		sparse	sparse	enriched		restricted but sparse				scattered	scattered				scattered
	CA3	scattered	scattered			widespread		restricted/laminar			restricted/laminar		sparse		scattered	sparse		enriched	sparse	restricted/laminar	enriched		scattered	sparse				sparse	enriched	sparse			enriched	sparse		sparse	sparse	enriched		restricted but sparse				scattered	scattered				scattered
	DG	scattered				widespread	sparse	restricted/laminar	enriched		restricted/laminar				restricted but sparse	sparse	restricted/laminar	enriched	sparse	restricted/laminar	enriched		scattered					sparse	enriched	sparse	restricted/laminar	restricted/laminar	enriched	sparse		sparse		enriched		restricted but sparse				scattered	scattered		sparse	sparse	sparse
	FC	scattered		enriched		widespread		restricted/laminar			restricted/laminar					sparse		enriched	sparse	restricted/laminar	enriched		scattered					sparse	enriched	sparse			enriched	sparse				enriched						scattered	scattered
	IG	scattered				widespread		restricted/laminar	enriched		restricted/laminar		restricted/laminar	restricted/laminar		sparse		enriched	sparse	restricted/laminar	enriched		scattered					sparse	enriched	sparse		restricted/laminar	enriched	sparse				enriched						scattered	scattered
	ENTl	scattered				widespread		restricted/laminar			restricted/laminar				restricted/laminar	sparse		restricted/laminar	sparse	restricted/laminar	enriched		scattered		restricted/laminar	sparse		sparse	enriched	sparse			enriched	sparse	restricted/laminar			enriched						scattered	scattered	restricted/laminar			restricted/laminar
	ENTm	scattered				widespread		restricted/laminar			restricted/laminar				restricted/laminar	sparse		restricted/laminar	sparse	restricted/laminar	enriched		scattered		restricted/laminar			sparse	enriched	sparse			enriched	sparse				enriched				restricted but sparse	restricted/laminar	scattered	scattered	restricted/laminar	restricted/laminar		restricted/laminar
	ENTmv	scattered				widespread	restricted but sparse	restricted/laminar			restricted/laminar				restricted/laminar	sparse		restricted/laminar	sparse	restricted/laminar	enriched		scattered					sparse	enriched	sparse			enriched	sparse				enriched						scattered	scattered	restricted/laminar
	PAR	scattered				widespread		restricted/laminar			restricted/laminar					sparse		enriched	sparse	restricted/laminar	enriched		scattered					sparse	enriched	sparse			enriched	sparse				enriched						scattered	scattered
	POST	scattered				widespread		restricted/laminar			restricted/laminar					sparse		enriched	sparse	restricted/laminar	enriched		scattered					sparse	enriched	sparse			enriched	sparse				enriched						scattered	scattered
	PRE	scattered				widespread		restricted/laminar			restricted/laminar					sparse		enriched	sparse	restricted/laminar	enriched		scattered					sparse	enriched	sparse			enriched	sparse				enriched						scattered	scattered
	SUBd	scattered		restricted/laminar		widespread	restricted but sparse	restricted/laminar			enriched		sparse	enriched	scattered	sparse	scattered	enriched	sparse	restricted/laminar	enriched		scattered	scattered		enriched		sparse	widespread	sparse	sparse	scattered	widespread	sparse		widespread	scattered	enriched		scattered			enriched	scattered	scattered		scattered
Cortical Subplate	CLA	scattered	restricted but sparse			widespread		restricted/laminar			restricted/laminar	scattered		enriched		sparse		enriched	sparse	restricted/laminar	enriched		scattered					sparse	enriched	sparse			enriched	sparse										scattered	scattered
	EPd	scattered				widespread		restricted/laminar			restricted/laminar	scattered				sparse		enriched	sparse	restricted/laminar	enriched	enriched	scattered					sparse	enriched	sparse			enriched	sparse										scattered	scattered	enriched
	EPv	scattered				widespread		restricted/laminar			restricted/laminar					sparse		enriched	sparse	restricted/laminar	enriched		scattered					sparse	enriched	sparse			enriched	sparse										scattered	scattered	enriched
	LA	scattered				widespread		restricted/laminar			restricted/laminar					sparse		enriched	sparse	restricted/laminar	enriched		scattered					sparse	enriched	sparse			enriched	sparse										scattered	scattered
	BLA	scattered	scattered			widespread		restricted/laminar			restricted/laminar	enriched				sparse		enriched	sparse	restricted/laminar	enriched		scattered					sparse	enriched	sparse			enriched	sparse				scattered		sparse				scattered	scattered	scattered	scattered		enriched
	BMA	scattered				widespread		restricted/laminar			restricted/laminar					sparse		enriched	sparse	restricted/laminar	enriched		scattered					sparse	enriched	sparse			enriched	sparse										scattered	scattered
	PA	scattered				widespread		restricted/laminar			restricted/laminar					sparse		enriched	sparse	restricted/laminar	enriched		scattered					sparse	enriched	sparse			enriched	sparse										scattered	scattered
Striatum	CP	scattered	restricted but sparse	widespread		widespread									sparse					sparse			scattered					sparse	enriched	sparse			enriched	sparse			restricted/laminar	sparse	scattered					scattered	scattered	scattered
	ACB	scattered				widespread																	scattered					sparse	enriched	sparse		scattered	enriched	sparse					scattered					scattered	scattered	scattered
	FS	scattered				widespread																	scattered					sparse	enriched	sparse			enriched	sparse					scattered					scattered	scattered	scattered
	OT	scattered		widespread		widespread						scattered											scattered					sparse	enriched	sparse			enriched	sparse					scattered					scattered	scattered	scattered
	LSc	scattered				widespread																	scattered					sparse	enriched	sparse			enriched	sparse					scattered					scattered	scattered	scattered
	LSr	scattered				widespread						scattered											scattered					sparse	enriched	sparse			enriched	sparse					scattered					scattered	scattered	scattered
	LSv	scattered				widespread																	scattered					sparse	enriched	sparse			enriched	sparse					scattered					scattered	scattered	scattered
	SF	scattered				widespread																	scattered					sparse	enriched	sparse			enriched	sparse					scattered					scattered	scattered	scattered
	SH	scattered				widespread																	scattered					sparse	enriched	sparse			enriched	sparse					scattered					scattered	scattered	scattered
	AAA	scattered				widespread																	scattered					sparse	enriched	sparse			enriched	sparse					scattered					scattered	scattered	scattered
	CEA	scattered				widespread																scattered	scattered					sparse	enriched	sparse			enriched	sparse					scattered					scattered	scattered	scattered
	IA	scattered				widespread																	scattered					sparse	enriched	sparse			enriched	sparse					scattered					scattered	scattered	scattered
	MEA	scattered				widespread																	scattered					sparse	enriched	sparse			enriched	sparse					scattered					scattered	scattered	scattered
Pallidum	GPe	scattered																					scattered					sparse	enriched	sparse			enriched	sparse										scattered	scattered
	GPi	scattered																					scattered					sparse	enriched	sparse			enriched	sparse										scattered	scattered
	SI	scattered																					scattered					sparse	enriched	sparse			enriched	sparse										scattered	scattered
	MA	scattered																					scattered					sparse	enriched	sparse			enriched	sparse										scattered	scattered
	MS	scattered																					scattered					sparse	enriched	sparse			enriched	sparse										scattered	scattered
	NDB	scattered																					scattered					sparse	enriched	sparse			enriched	sparse										scattered	scattered
	TRS	scattered																					scattered					sparse	enriched	sparse			enriched	sparse										scattered	scattered
	BST	scattered																					scattered					sparse	enriched	sparse			enriched	sparse										scattered	scattered
	BAC	scattered																					scattered					sparse	enriched	sparse			enriched	sparse										scattered	scattered
Thalamus	VAL	scattered																																										scattered	scattered
	VM	scattered																																										scattered	scattered
	VPL	scattered																																										scattered	scattered
	VPM	scattered																																										scattered	scattered
	VPMpc	scattered																																										scattered	scattered
	SPFp	scattered																																										scattered	scattered
	SPA	scattered																																										scattered	scattered
	PP	scattered																																										scattered	scattered
	MGd	scattered																																										scattered	scattered
	LGd	scattered																								enriched															enriched			scattered	scattered
	LP	scattered																																							scattered			scattered	scattered
	PO	scattered																																										scattered	scattered
	AV	scattered																																										scattered	scattered
	AMd	scattered																																							scattered			scattered	scattered
	AD	scattered																																							scattered			scattered	scattered
	IAM	scattered																																										scattered	scattered
	IAD	scattered																																										scattered	scattered
	LD	scattered																																							scattered			scattered	scattered
	IMD	scattered																																							scattered			scattered	scattered
	MD	scattered																																							scattered			scattered	scattered
	SMT	scattered																																										scattered	scattered
	PR	scattered																																										scattered	scattered
	PVT	scattered																																							scattered			scattered	scattered
	PT	scattered																																							scattered			scattered	scattered
	RE	scattered																																							scattered			scattered	scattered
	RH	scattered																																										scattered	scattered
	CM	scattered																																										scattered	scattered
	PCN	scattered																																										scattered	scattered
	CL	scattered																																										scattered	scattered
	PF	scattered																																										scattered	scattered
	RT	scattered																																										scattered	scattered
	IGL	scattered																																										scattered	scattered
	LGv	scattered																																										scattered	scattered
	SubG	scattered																																										scattered	scattered
	MH	scattered																					enriched																					scattered	scattered
	LH	scattered																																										scattered	scattered
Hypothalamus	SO	scattered	sparse																																									scattered	scattered
	PVH	scattered	sparse																																									scattered	scattered				restricted but sparse
	ARH	scattered	sparse																																									scattered	scattered
	AVPV	scattered	sparse																							sparse																		scattered	scattered
	DMH	scattered	sparse																							sparse																		scattered	scattered
	MEPO	scattered	sparse																							sparse																		scattered	scattered
	MPO	scattered	sparse																							sparse																		scattered	scattered
	PVp	scattered	sparse																							sparse														scattered				scattered	scattered
	SCH	scattered	sparse																							sparse																		scattered	scattered
	SFO	scattered	sparse																							sparse																		scattered	scattered
	AHN	scattered	sparse																																									scattered	scattered
	LM	scattered	sparse																																									scattered	scattered
	MM	scattered	sparse																																									scattered	scattered
	SUM	scattered	sparse																																									scattered	scattered
	TMd	scattered	sparse																																									scattered	scattered
	MPN	scattered	sparse																																									scattered	scattered
	PMd	scattered	sparse																																									scattered	scattered
	PMv	scattered	sparse																																									scattered	scattered
	VMH	scattered	sparse																							sparse																		scattered	scattered
	PH	scattered	sparse																																									scattered	scattered
	LHA	scattered	sparse																																									scattered	scattered
	LPO	scattered	sparse																																									scattered	scattered
	PSTN	scattered	sparse																																									scattered	scattered
	RCH	scattered	sparse																																									scattered	scattered
	STN	scattered	sparse																																									scattered	scattered
	TU	scattered	sparse																																									scattered	scattered
	ZI	scattered	sparse																																									scattered	scattered
Midbrain	SCs	scattered																	scattered																		sparse				sparse			scattered	scattered
	ICc	scattered																																		sparse	sparse							scattered	scattered	scattered
	NB	scattered																																										scattered	scattered
	SAG	scattered																																										scattered	scattered
	PBG	scattered																																										scattered	scattered
	MEV	scattered																																										scattered	scattered
	SNr	scattered																																										scattered	scattered
	VTA	scattered																																										scattered	scattered
	RR	scattered																																										scattered	scattered
	MRN	scattered																																										scattered	scattered
	SCm	scattered																	scattered																						sparse			scattered	scattered
	PAG	scattered																																										scattered	scattered
	APN	scattered																																										scattered	scattered
	MPT	scattered																																										scattered	scattered
	NOT	scattered																																										scattered	scattered
	NPC	scattered																																										scattered	scattered
	OP	scattered																																										scattered	scattered
	PPT	scattered																																										scattered	scattered
	CUN	scattered																																										scattered	scattered
	RN	scattered																																										scattered	scattered
	III	scattered																																										scattered	scattered
	EW	scattered																																										scattered	scattered
	IV	scattered																																										scattered	scattered
	VTN	scattered																																										scattered	scattered
	SNc	scattered																																										scattered	scattered
	PPN	scattered																																										scattered	scattered
	IF	scattered																																										scattered	scattered
	IPN	scattered												enriched																														scattered	scattered
	RL	scattered																																										scattered	scattered
	CLI	scattered																																										scattered	scattered
	DR	scattered																																										scattered	scattered
Pons	NLL	scattered																																										scattered	scattered
	PSV	scattered																																										scattered	scattered
	PB	scattered																																										scattered	scattered
	SOC	scattered																																										scattered	scattered
	DTN	scattered																																										scattered	scattered
	PCG	scattered																																										scattered	scattered
	PG	scattered																																										scattered	scattered
	PRNc	scattered																																										scattered	scattered
	SUT	scattered																																										scattered	scattered
	TRN	scattered																																										scattered	scattered
	V	scattered																																										scattered	scattered
	CS	scattered																																										scattered	scattered
	LC	scattered																																										scattered	scattered
	LDT	scattered																																										scattered	scattered
	PRNr	scattered																																										scattered	scattered
Medulla	AP	scattered																	enriched							sparse																		scattered	scattered
	DCO	scattered																	enriched																									scattered	scattered
	VCO	scattered																	enriched																									scattered	scattered
	CU	scattered	restricted but sparse																enriched																									scattered	scattered
	GR	scattered	restricted but sparse																enriched																									scattered	scattered
	ECU	scattered																	enriched																									scattered	scattered
	NTS	scattered	restricted but sparse																enriched		enriched					restricted but sparse																		scattered	scattered	scattered
	SPVC	scattered																	enriched																									scattered	scattered
	SPVI	scattered																	enriched																									scattered	scattered
	SPVO	scattered																	enriched																									scattered	scattered
	VI	scattered																	enriched																									scattered	scattered
	VII	scattered																	enriched																									scattered	scattered
	ACVII	scattered																	enriched																									scattered	scattered
	AMB	scattered																	enriched																									scattered	scattered
	DMX	scattered																	enriched																									scattered	scattered
	GRN	scattered																	enriched																									scattered	scattered
	IO	scattered																	enriched																								restricted/laminar	scattered	scattered
	IRN	scattered																	enriched																								sparse	scattered	scattered
	LRN	scattered																	enriched																									scattered	scattered
	MARN	scattered																	enriched																									scattered	scattered
	MDRNd	scattered																	enriched																									scattered	scattered
	PARN	scattered																	enriched																									scattered	scattered
	PGRNl	scattered																	enriched																									scattered	scattered
	PRP	scattered																	enriched																		restricted but sparse							scattered	scattered
	LAV	scattered																	enriched																									scattered	scattered
	MV	scattered																	enriched																									scattered	scattered
	SPIV	scattered																	enriched																									scattered	scattered
	SUV	scattered																	enriched																									scattered	scattered
	x	scattered																	enriched																									scattered	scattered
	XII	scattered																	enriched																									scattered	scattered
	RM	scattered																	enriched																									scattered	scattered
	RPA	scattered																	enriched																									scattered	scattered
	RO	scattered																	enriched																									scattered	scattered
Cerebellum	LING	scattered				widespread	restricted/laminar		sparse										enriched					sparse		sparse		sparse								sparse					widespread			scattered	restricted but sparse		sparse
	CENT	scattered				widespread	restricted/laminar		sparse										enriched					sparse		sparse		sparse								sparse					widespread			scattered	restricted but sparse		sparse
	CUL	scattered				widespread	restricted/laminar		sparse										enriched					sparse		sparse		sparse								sparse					widespread			scattered	restricted but sparse		sparse
	DEC	scattered				widespread	restricted/laminar		sparse										enriched					sparse		sparse		sparse								sparse					widespread			scattered	restricted but sparse		sparse
	FOTU	scattered				widespread	restricted/laminar		sparse										enriched					sparse		sparse		sparse								sparse					widespread			scattered	restricted but sparse		sparse
	PYR	scattered				widespread	restricted/laminar		sparse										enriched					sparse		sparse		sparse								sparse					widespread			scattered	restricted but sparse		sparse
	UVU	scattered				widespread	restricted/laminar		sparse										enriched					sparse		sparse		sparse								sparse					widespread			scattered	restricted but sparse		sparse
	NOD	scattered				widespread	restricted/laminar		sparse										enriched					sparse		sparse		sparse								sparse					widespread			scattered	restricted but sparse		sparse
	SIM	scattered				widespread	restricted/laminar		sparse										enriched					sparse		sparse		sparse								sparse					widespread			scattered	restricted but sparse		sparse
	AN	scattered				widespread	restricted/laminar		sparse										enriched					sparse		sparse		sparse								sparse					widespread			scattered	restricted but sparse		sparse
	PRM	scattered				widespread	restricted/laminar		sparse										enriched					sparse		sparse		sparse								sparse					widespread			scattered	restricted but sparse		sparse
	COPY	scattered				widespread	restricted/laminar		sparse										enriched					sparse		sparse		sparse								sparse					widespread			scattered	restricted but sparse		sparse
	PFL	scattered				widespread	restricted/laminar		sparse										enriched					sparse		sparse		sparse								sparse					widespread			scattered	restricted but sparse		sparse
	FL	scattered				widespread	restricted/laminar		sparse										enriched					sparse		sparse		sparse								sparse					widespread			scattered	restricted but sparse		sparse
	FN	scattered																								sparse										sparse								scattered			sparse
	IP	scattered																								sparse										sparse								scattered			sparse
	DN	scattered																								sparse										sparse								scattered			sparse
[truncated: 56 more columns]
