# Supplementary figures and images for: A Mammalian enhancer trap resource for discovering and manipulating neuronal cell types
Source: eLife journal article supplement (doi:10.7554/elife.13503), 2016-03-19

**A**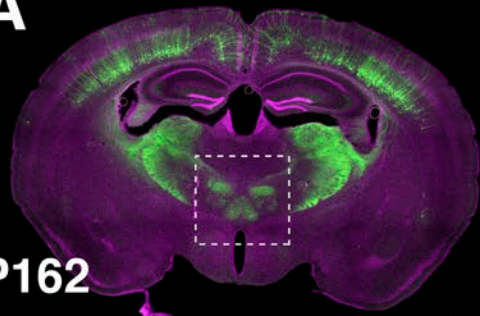**P162****B**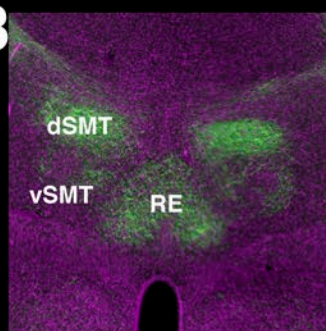**dSMT****vSMT****RE****C**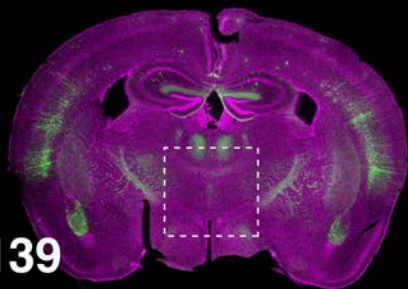**P139****D**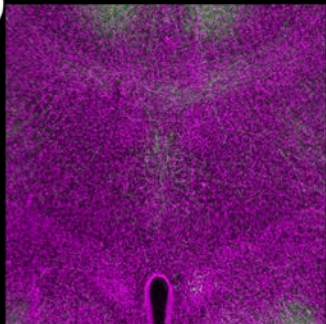**E**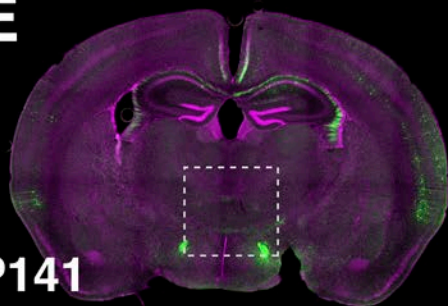**P141****F**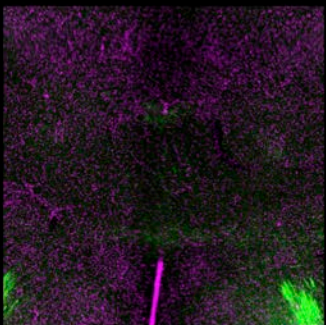**G**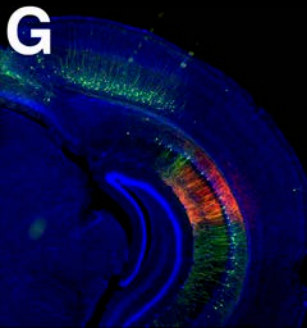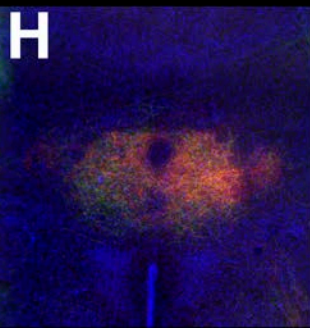**H**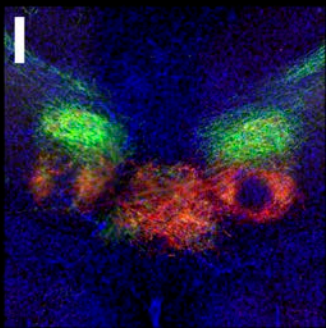**I**

Supplement: supp [file elife-13503-supp-v1.zip]

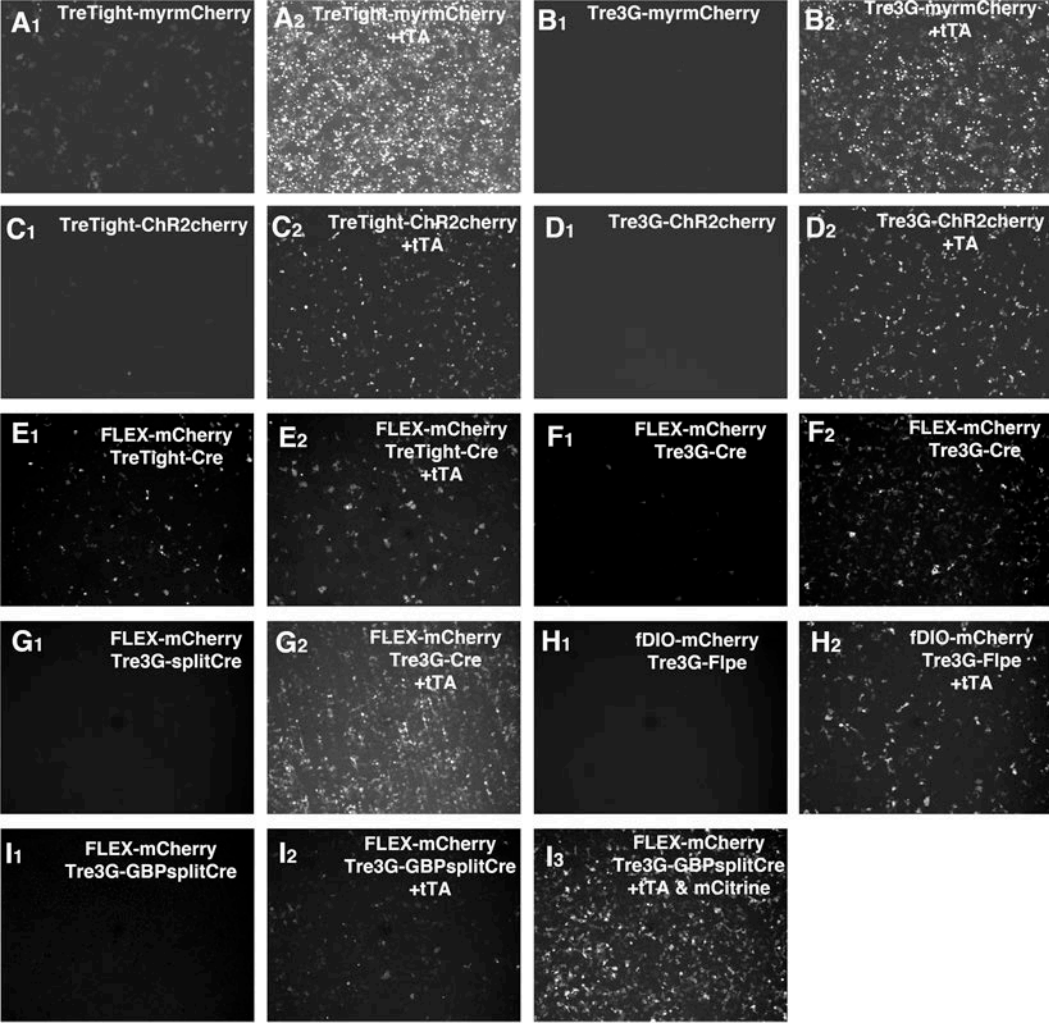

Supplement: supp [file elife-13503-supp-v1.zip]

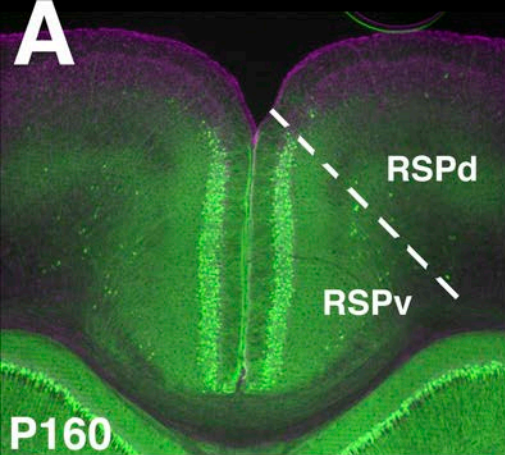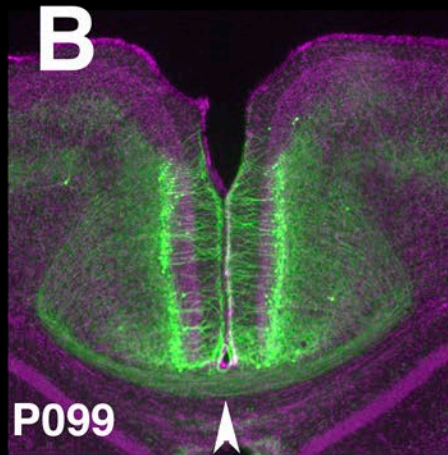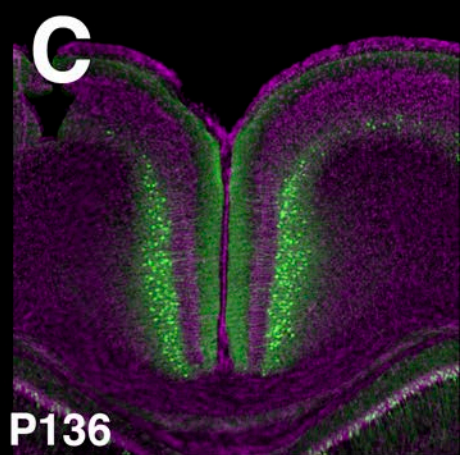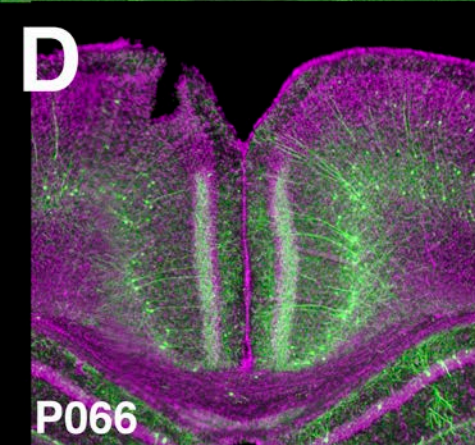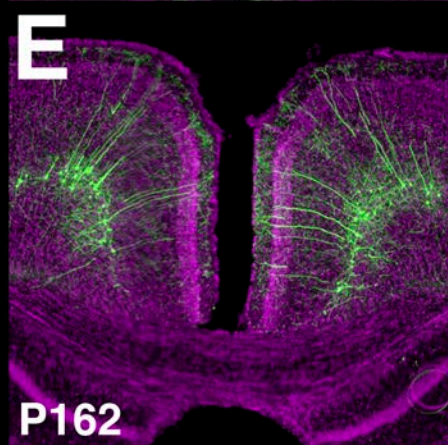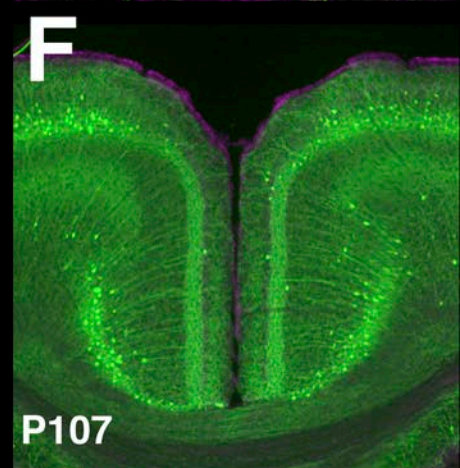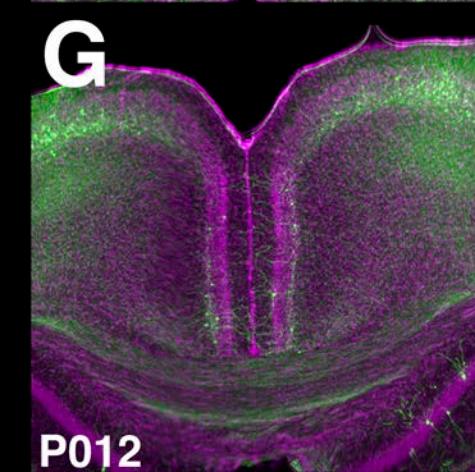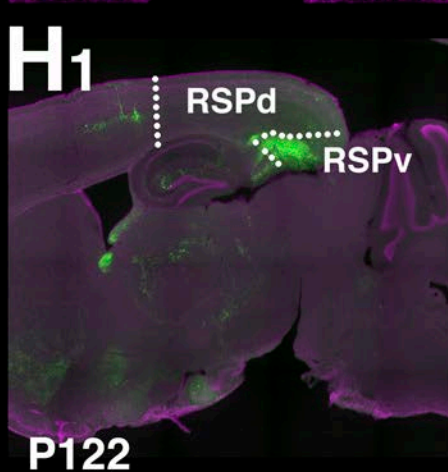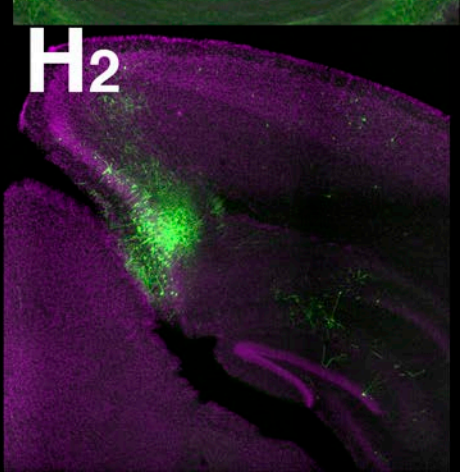

Supplement: supp [file elife-13503-supp-v1.zip]

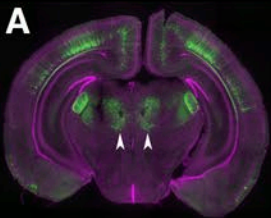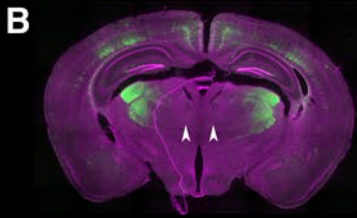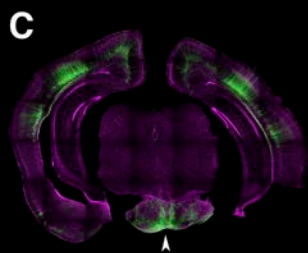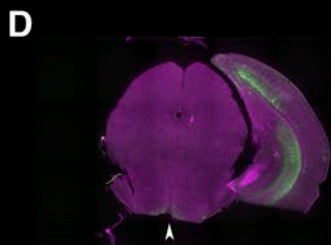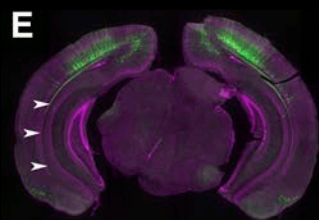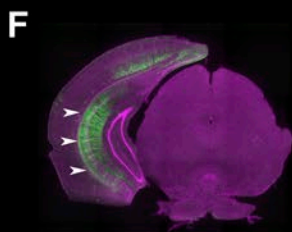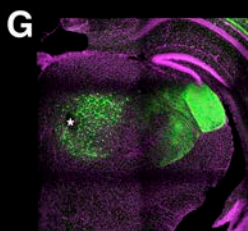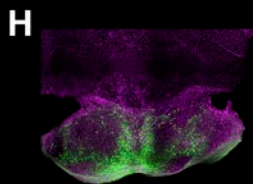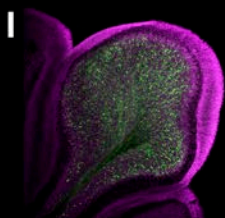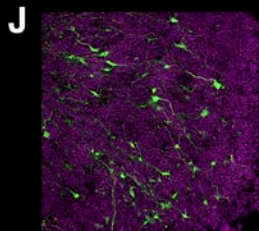

Supplement: supp [file elife-13503-supp-v1.zip]

56L

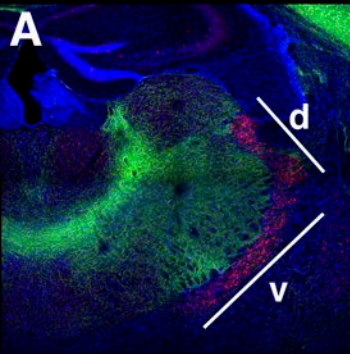

P162

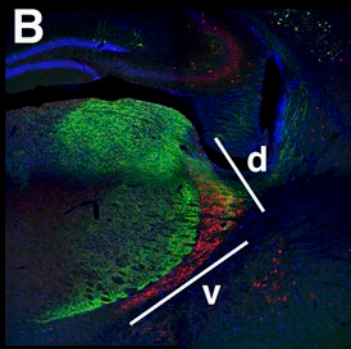

P139

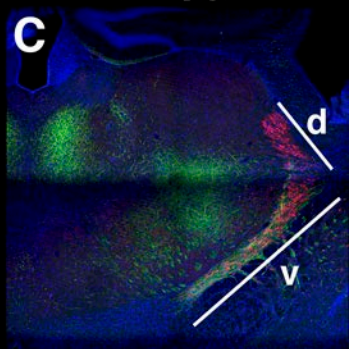

DAPI/a-GFP/a-PV

Supplement: supp [file elife-13503-supp-v1.zip]

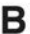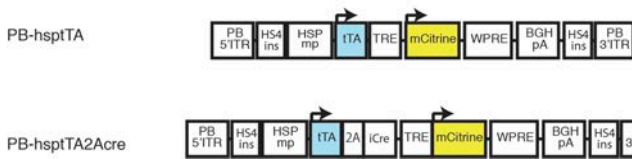

Supplement: supp [file elife-13503-supp-v1.zip]

100 kb

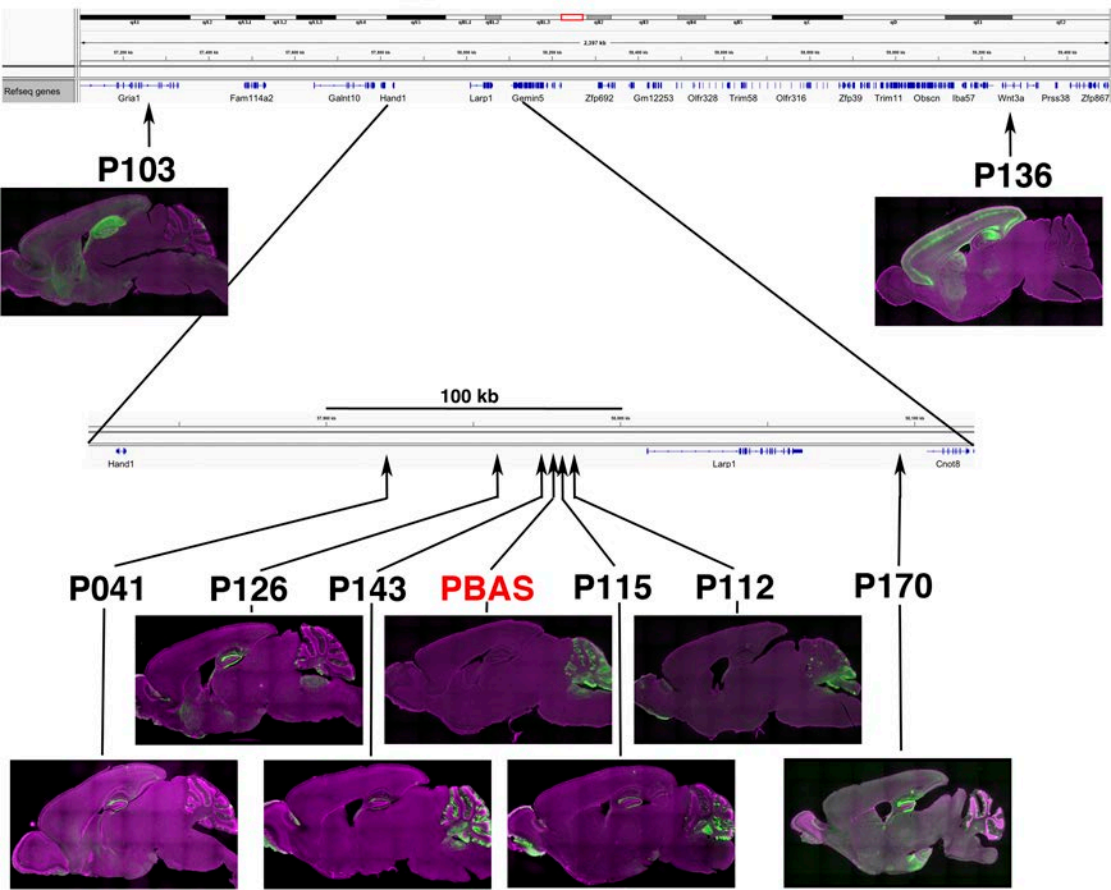

Supplement: supp [file elife-13503-supp-v1.zip]

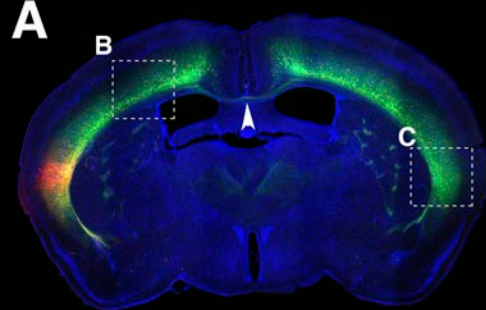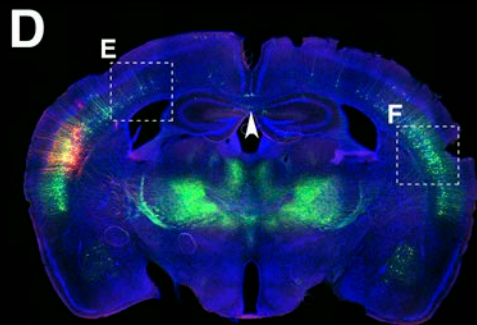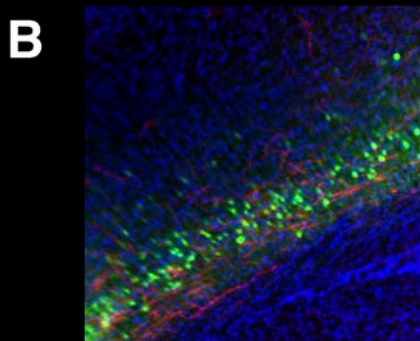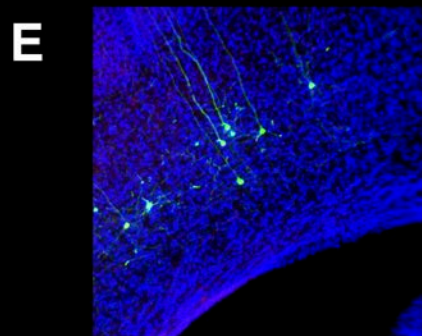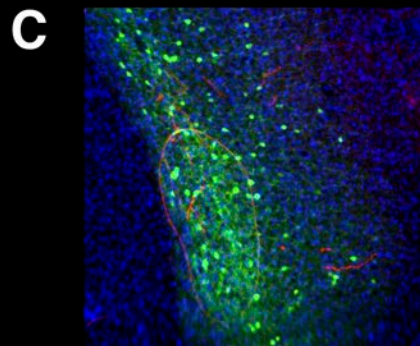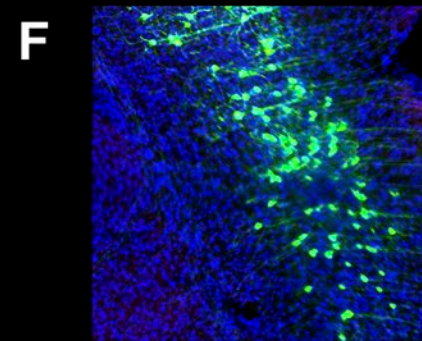

Supplement: supp [file elife-13503-supp-v1.zip]

**A**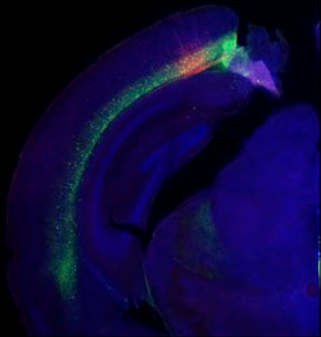**B**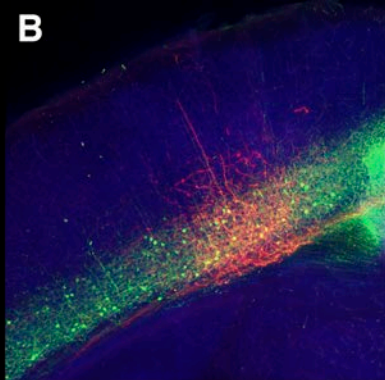**C**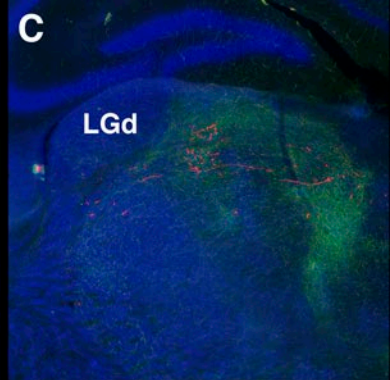

Supplement: supp [file elife-13503-supp-v1.zip]

**A**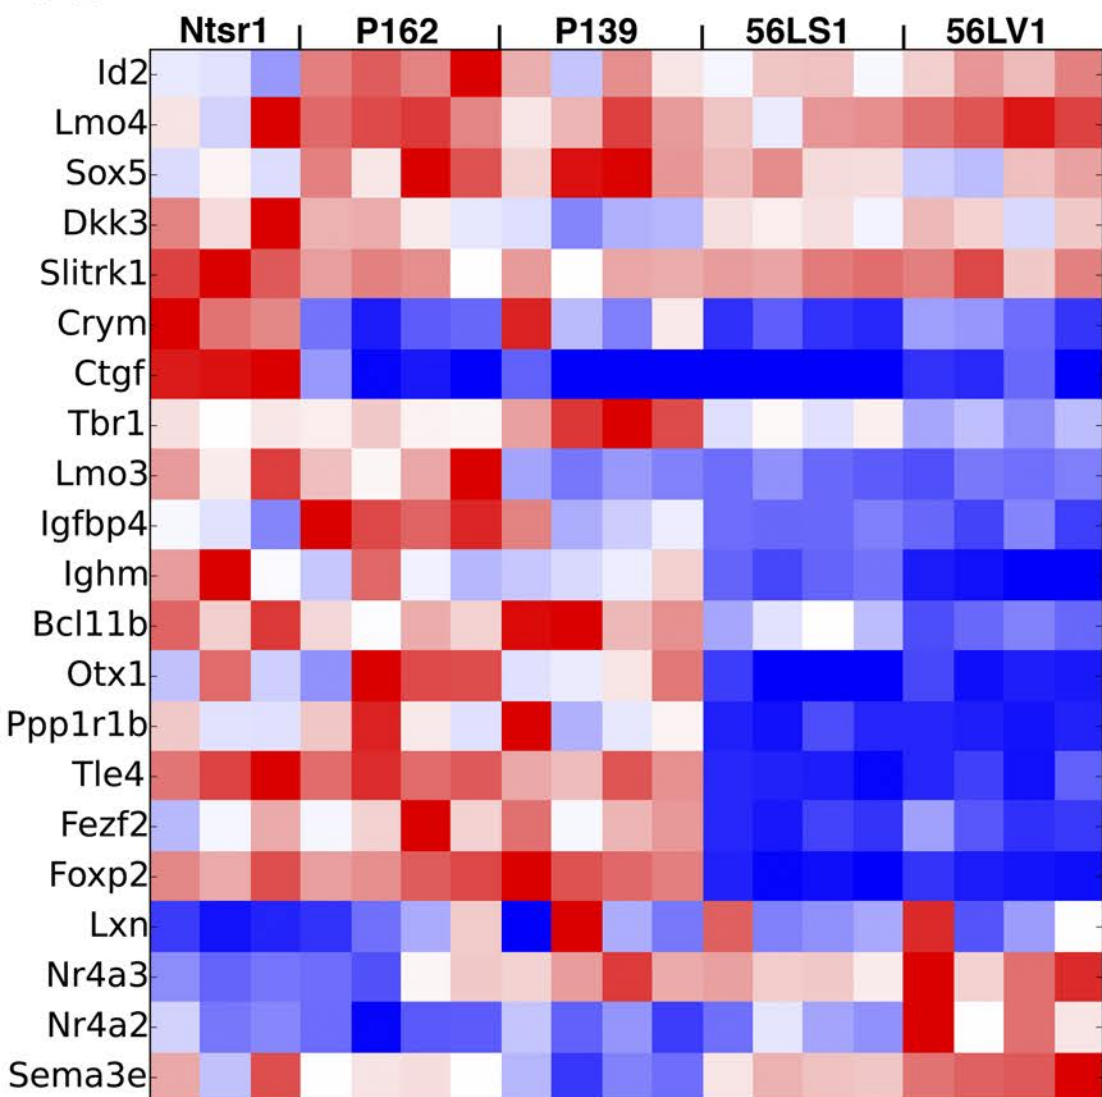**B**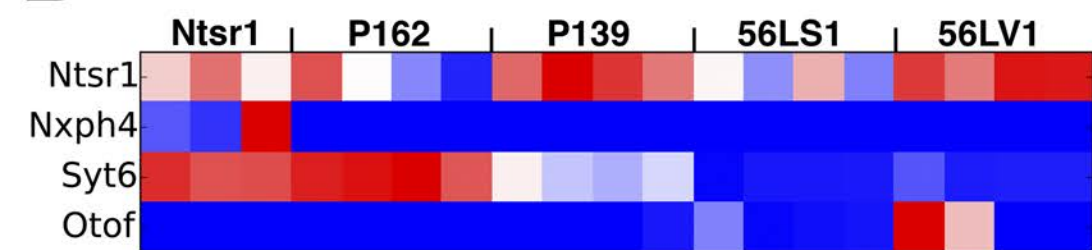**C**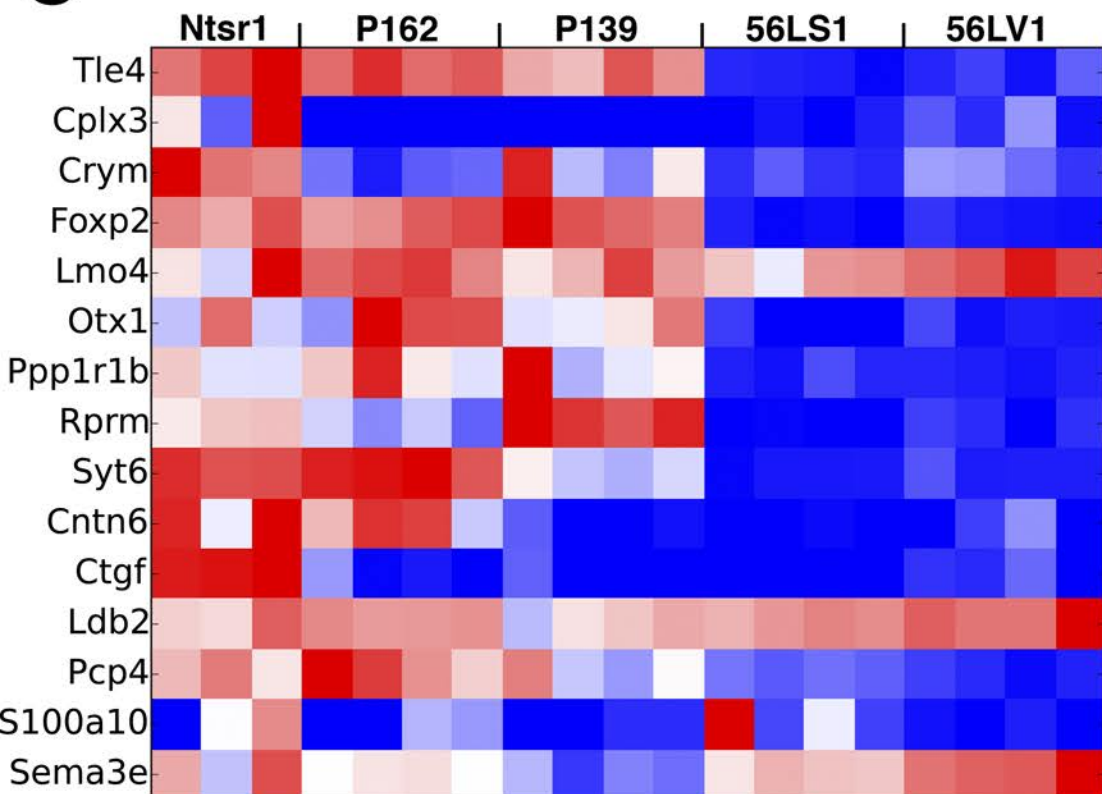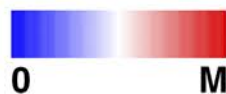

Supplement: supp [file elife-13503-supp-v1.zip]

**A1**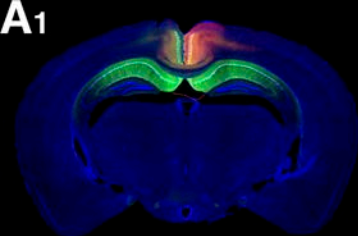**B1**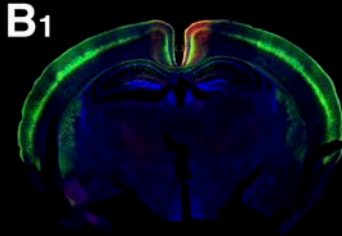**C1**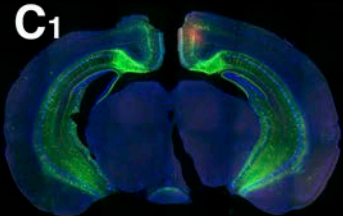**A2**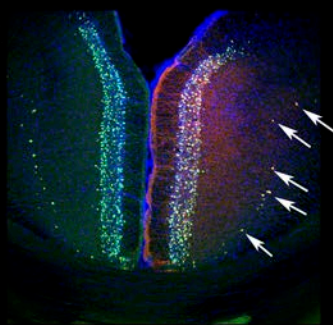**B2**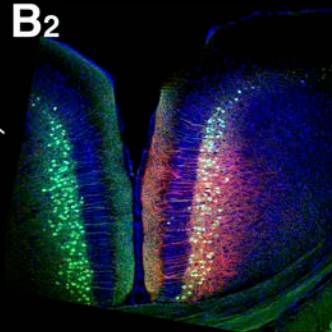**C2**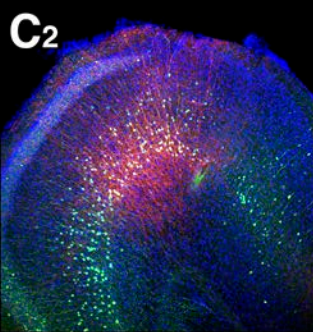**D1**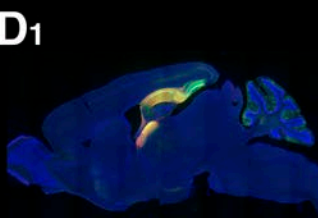**E1**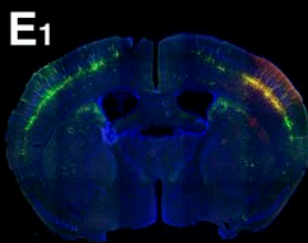**F1**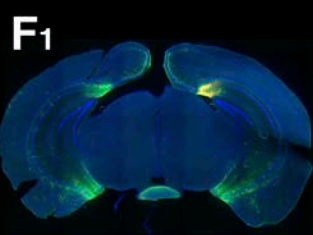**D2**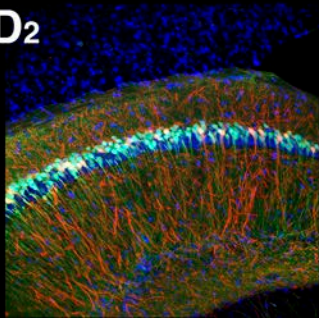**E2**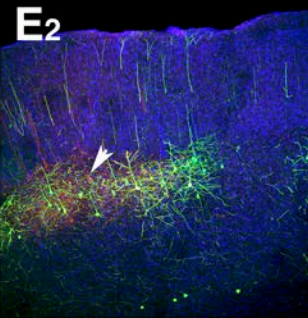**F2**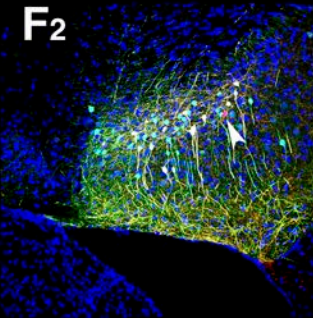

Supplement: supp [file elife-13503-supp-v1.zip]

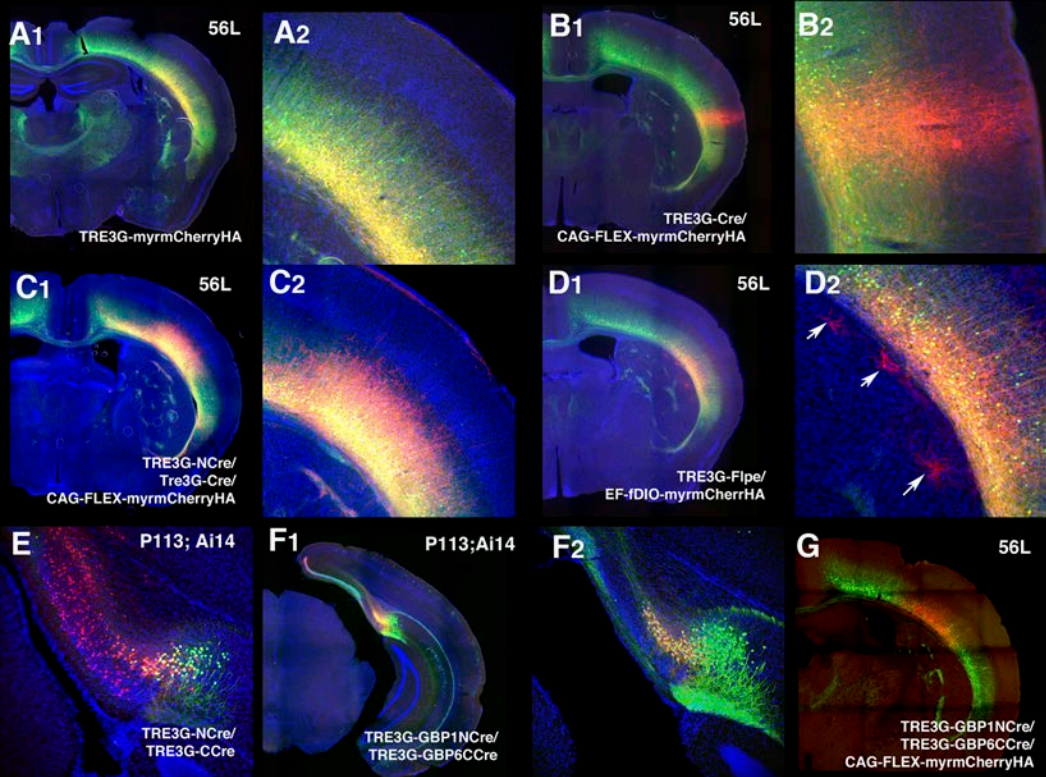

Supplement: supp [file elife-13503-supp-v1.zip]

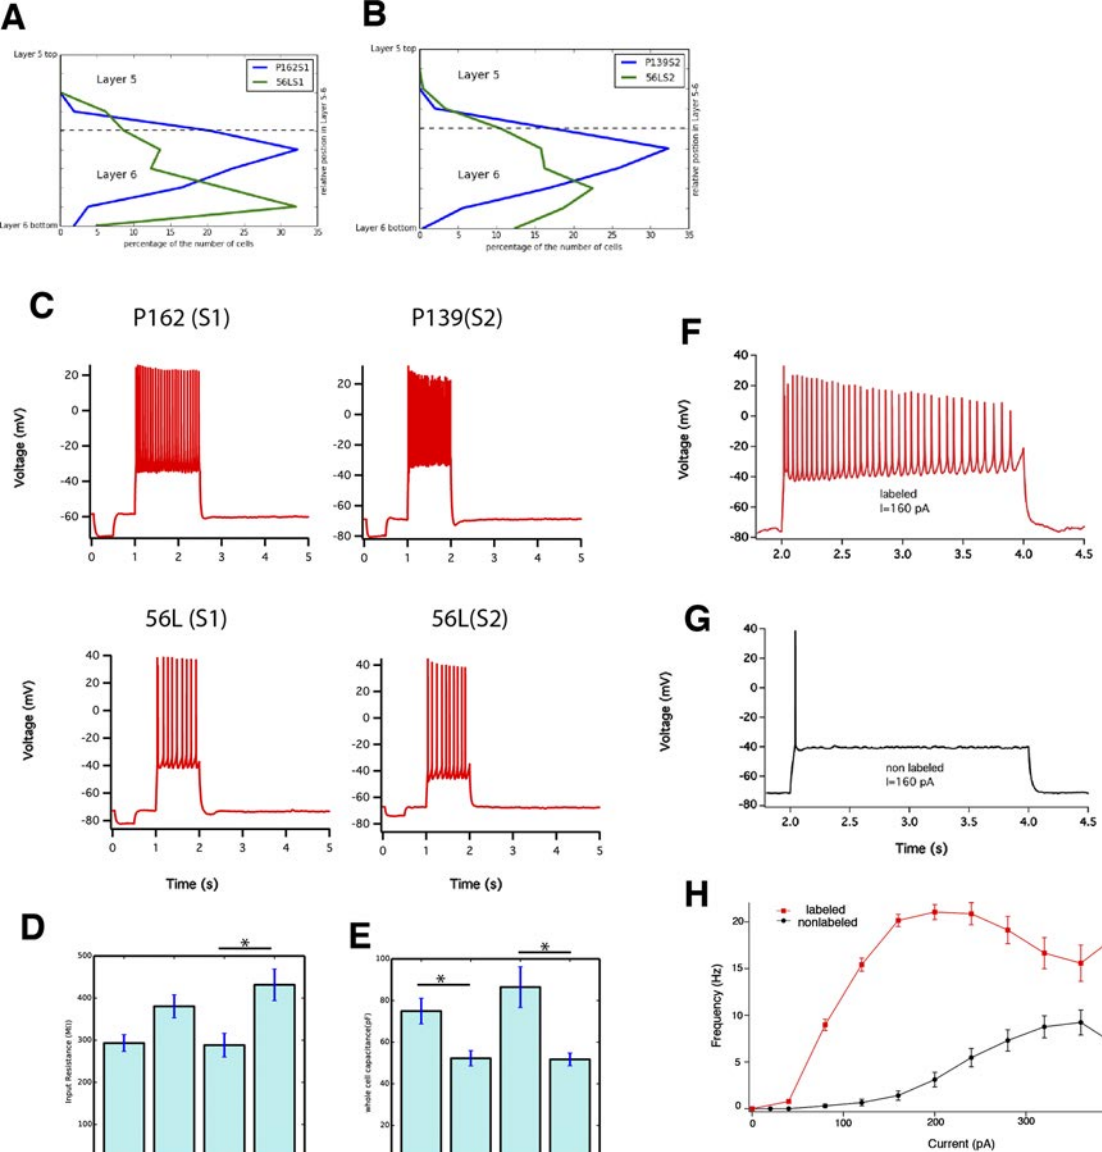

Supplement: supp [file elife-13503-supp-v1.zip]

**A**

## Lentivirus transgenesis

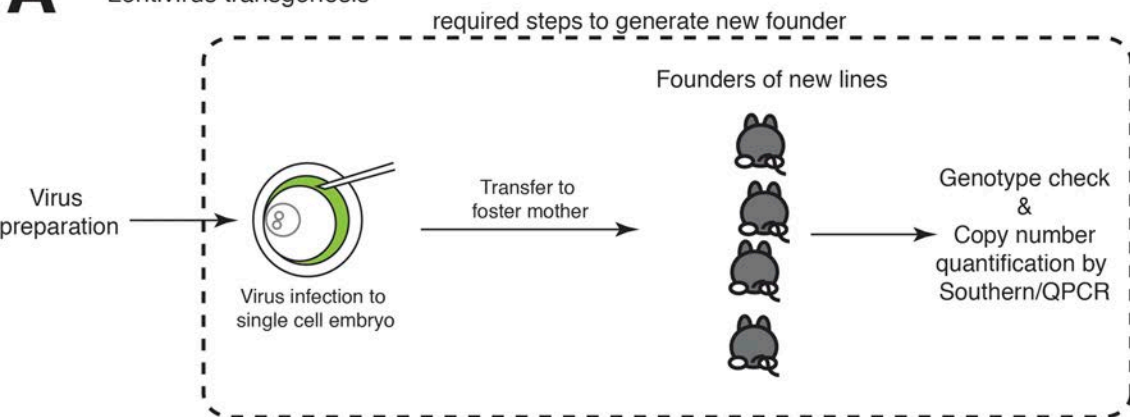**B**

## PB seed line generation

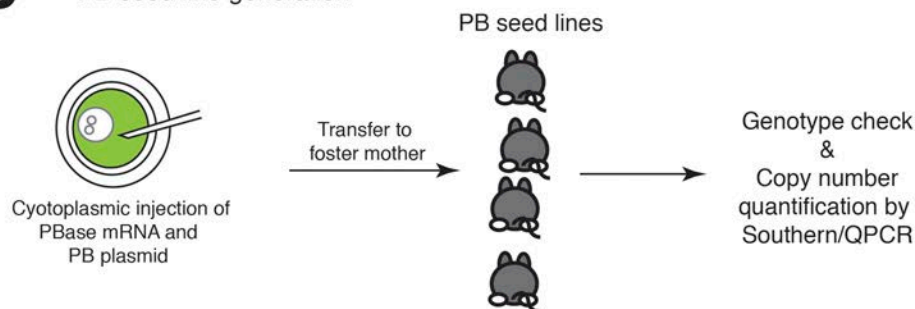

## PB transgenesis

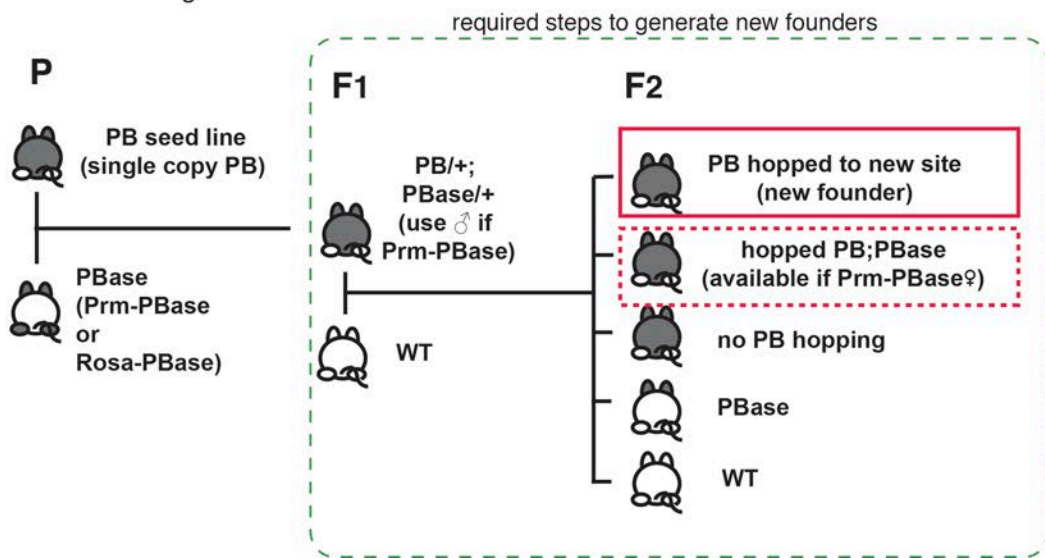

Supplement: supp [file elife-13503-supp-v1.zip]

**A**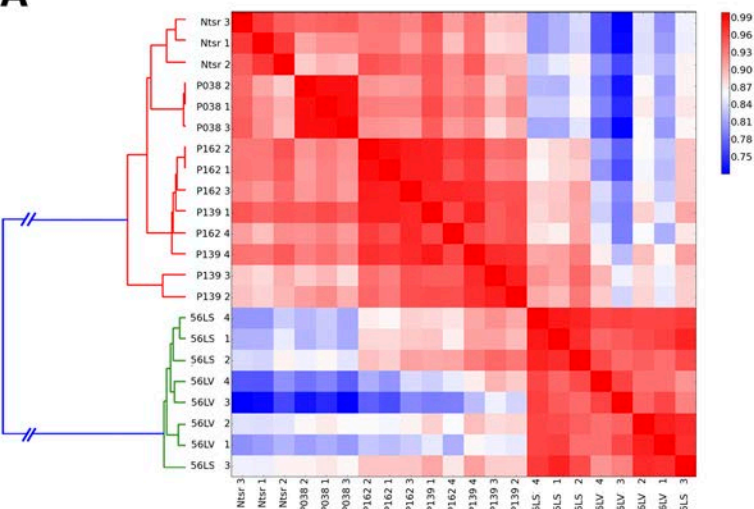**C**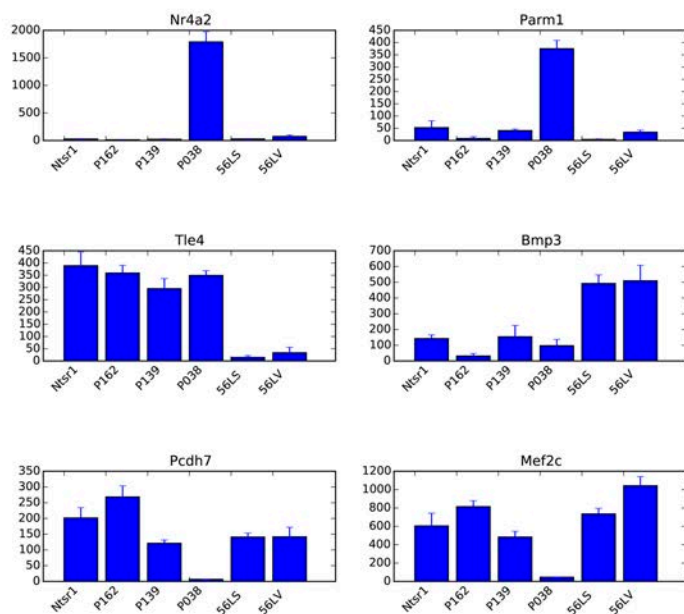**B**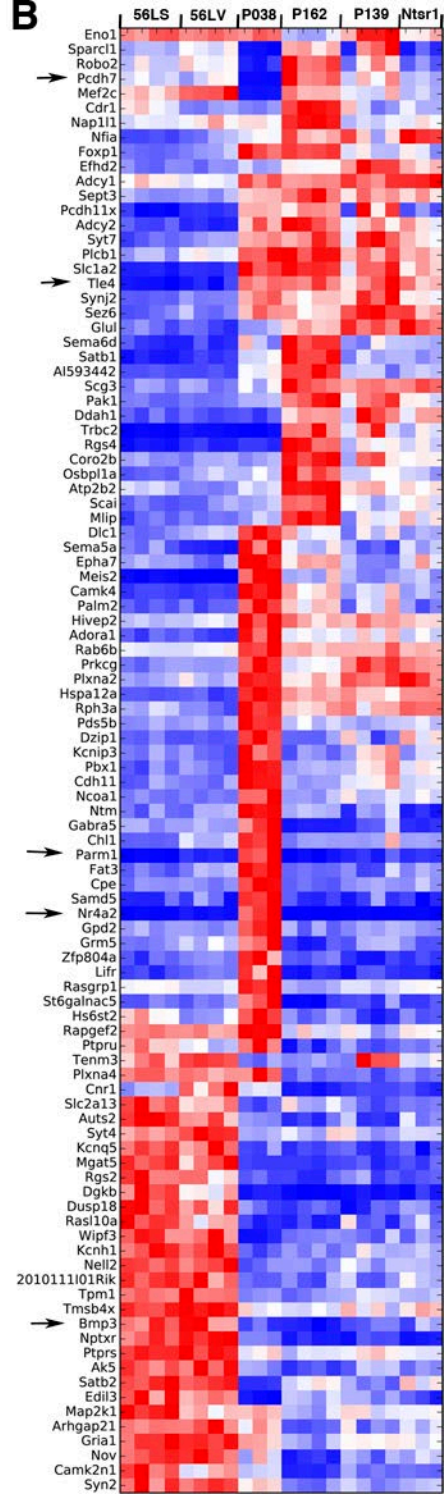

Supplement: supp [file elife-13503-supp-v1.zip]

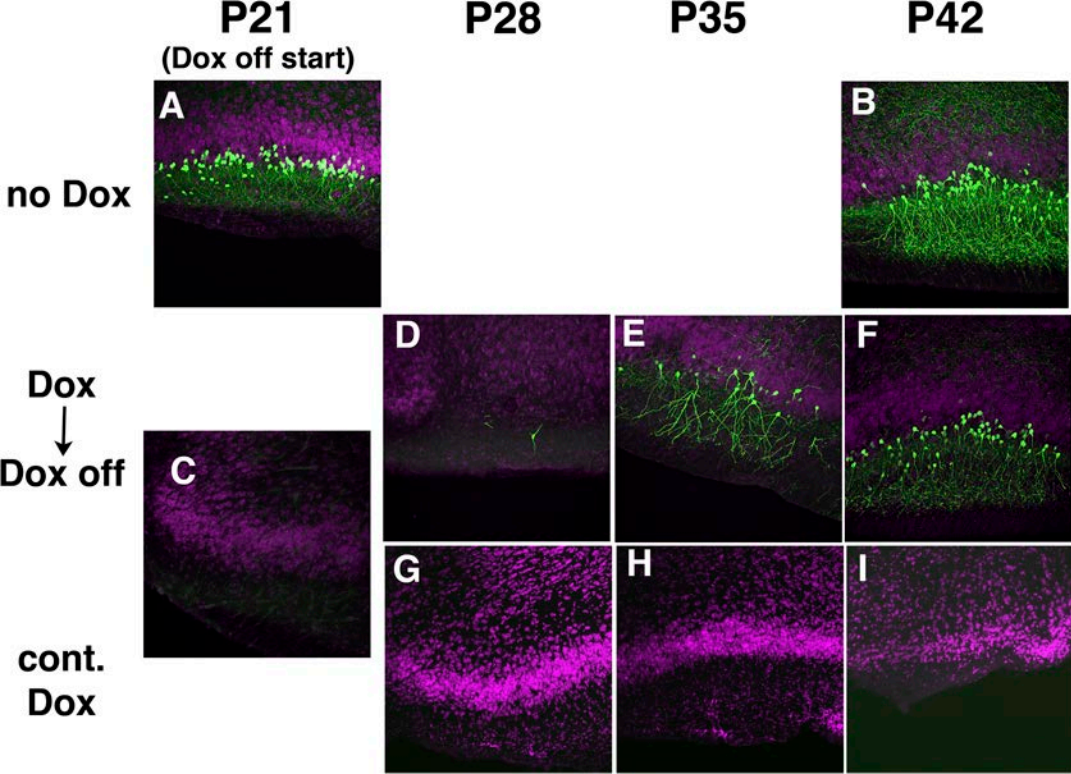

Supplement: supp [file elife-13503-supp-v1.zip]
